# Supplementary material for: High expression of Helicobacter pylori VapD in both the intracellular environment and biopsies from gastric patients with severity
Source: PubMed Central journal article supplement (PMC7067408; doi:10.1371/journal.pone.0230220), 2020-03-12
Supplement: pone.0230220.s003.pdf [file pone.0230220.s003.pdf]

0  $\mu\text{m}$  25

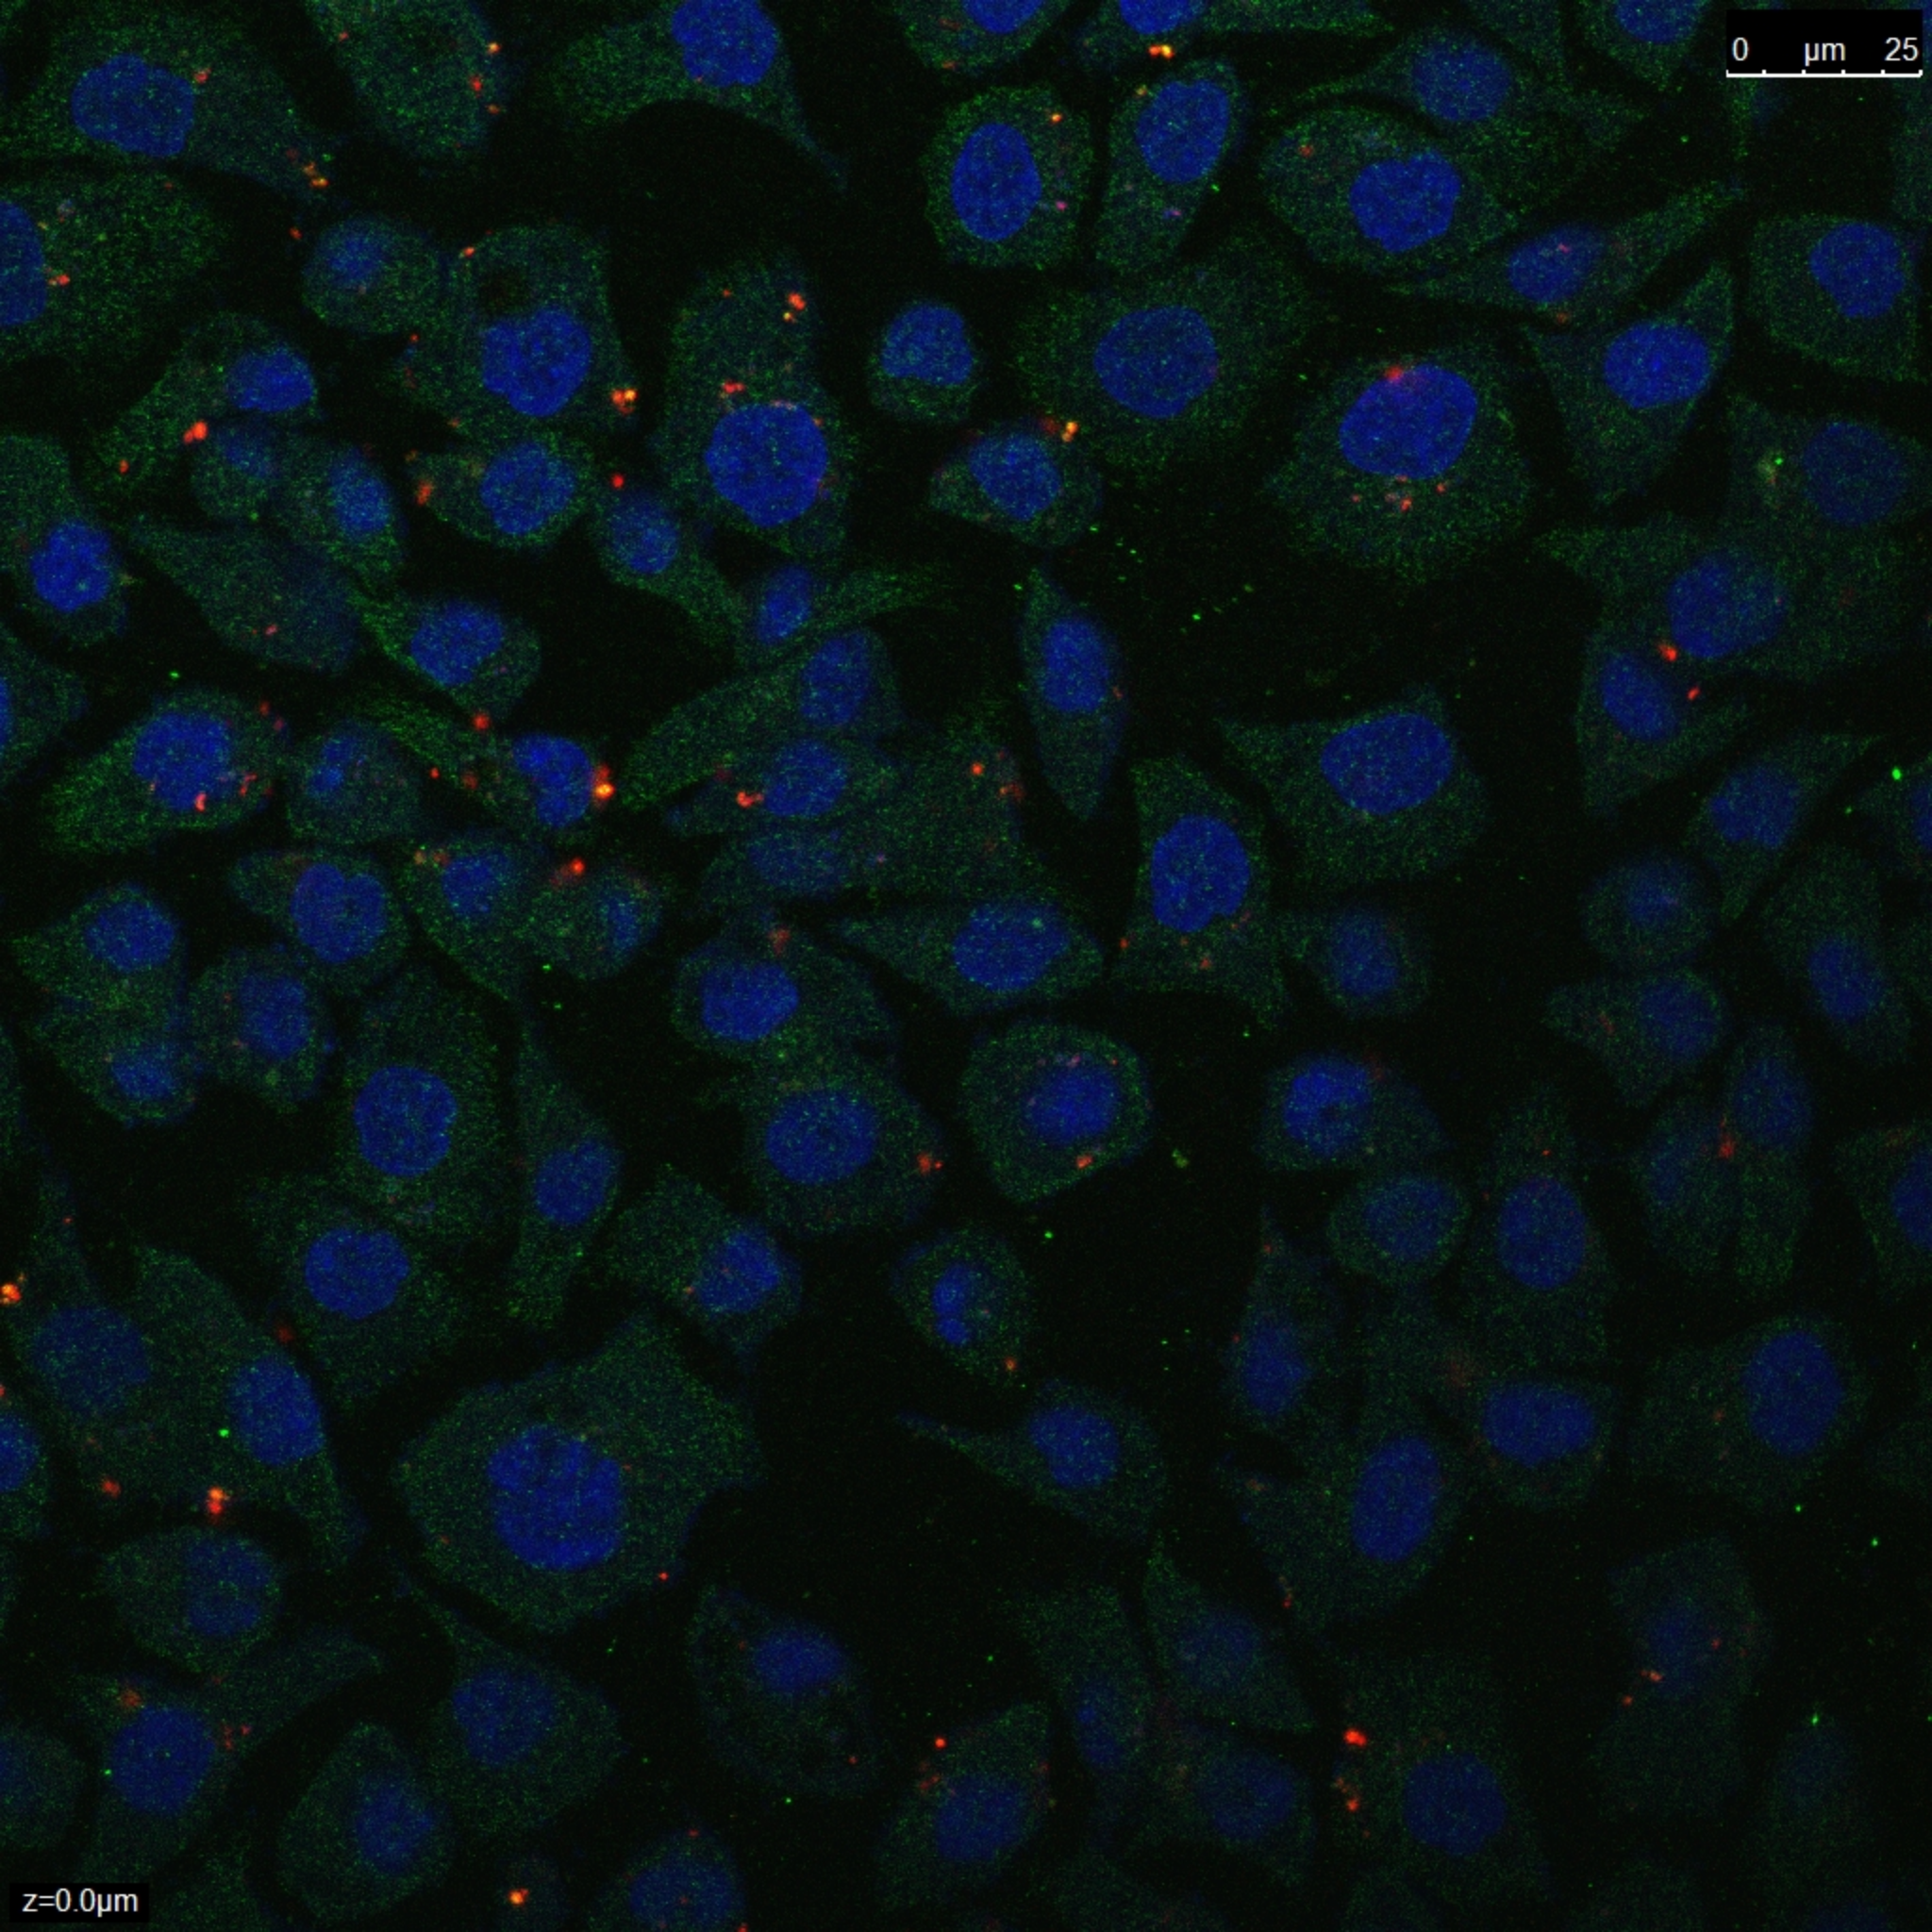

$z=0.0\mu\text{m}$

0  $\mu\text{m}$  25

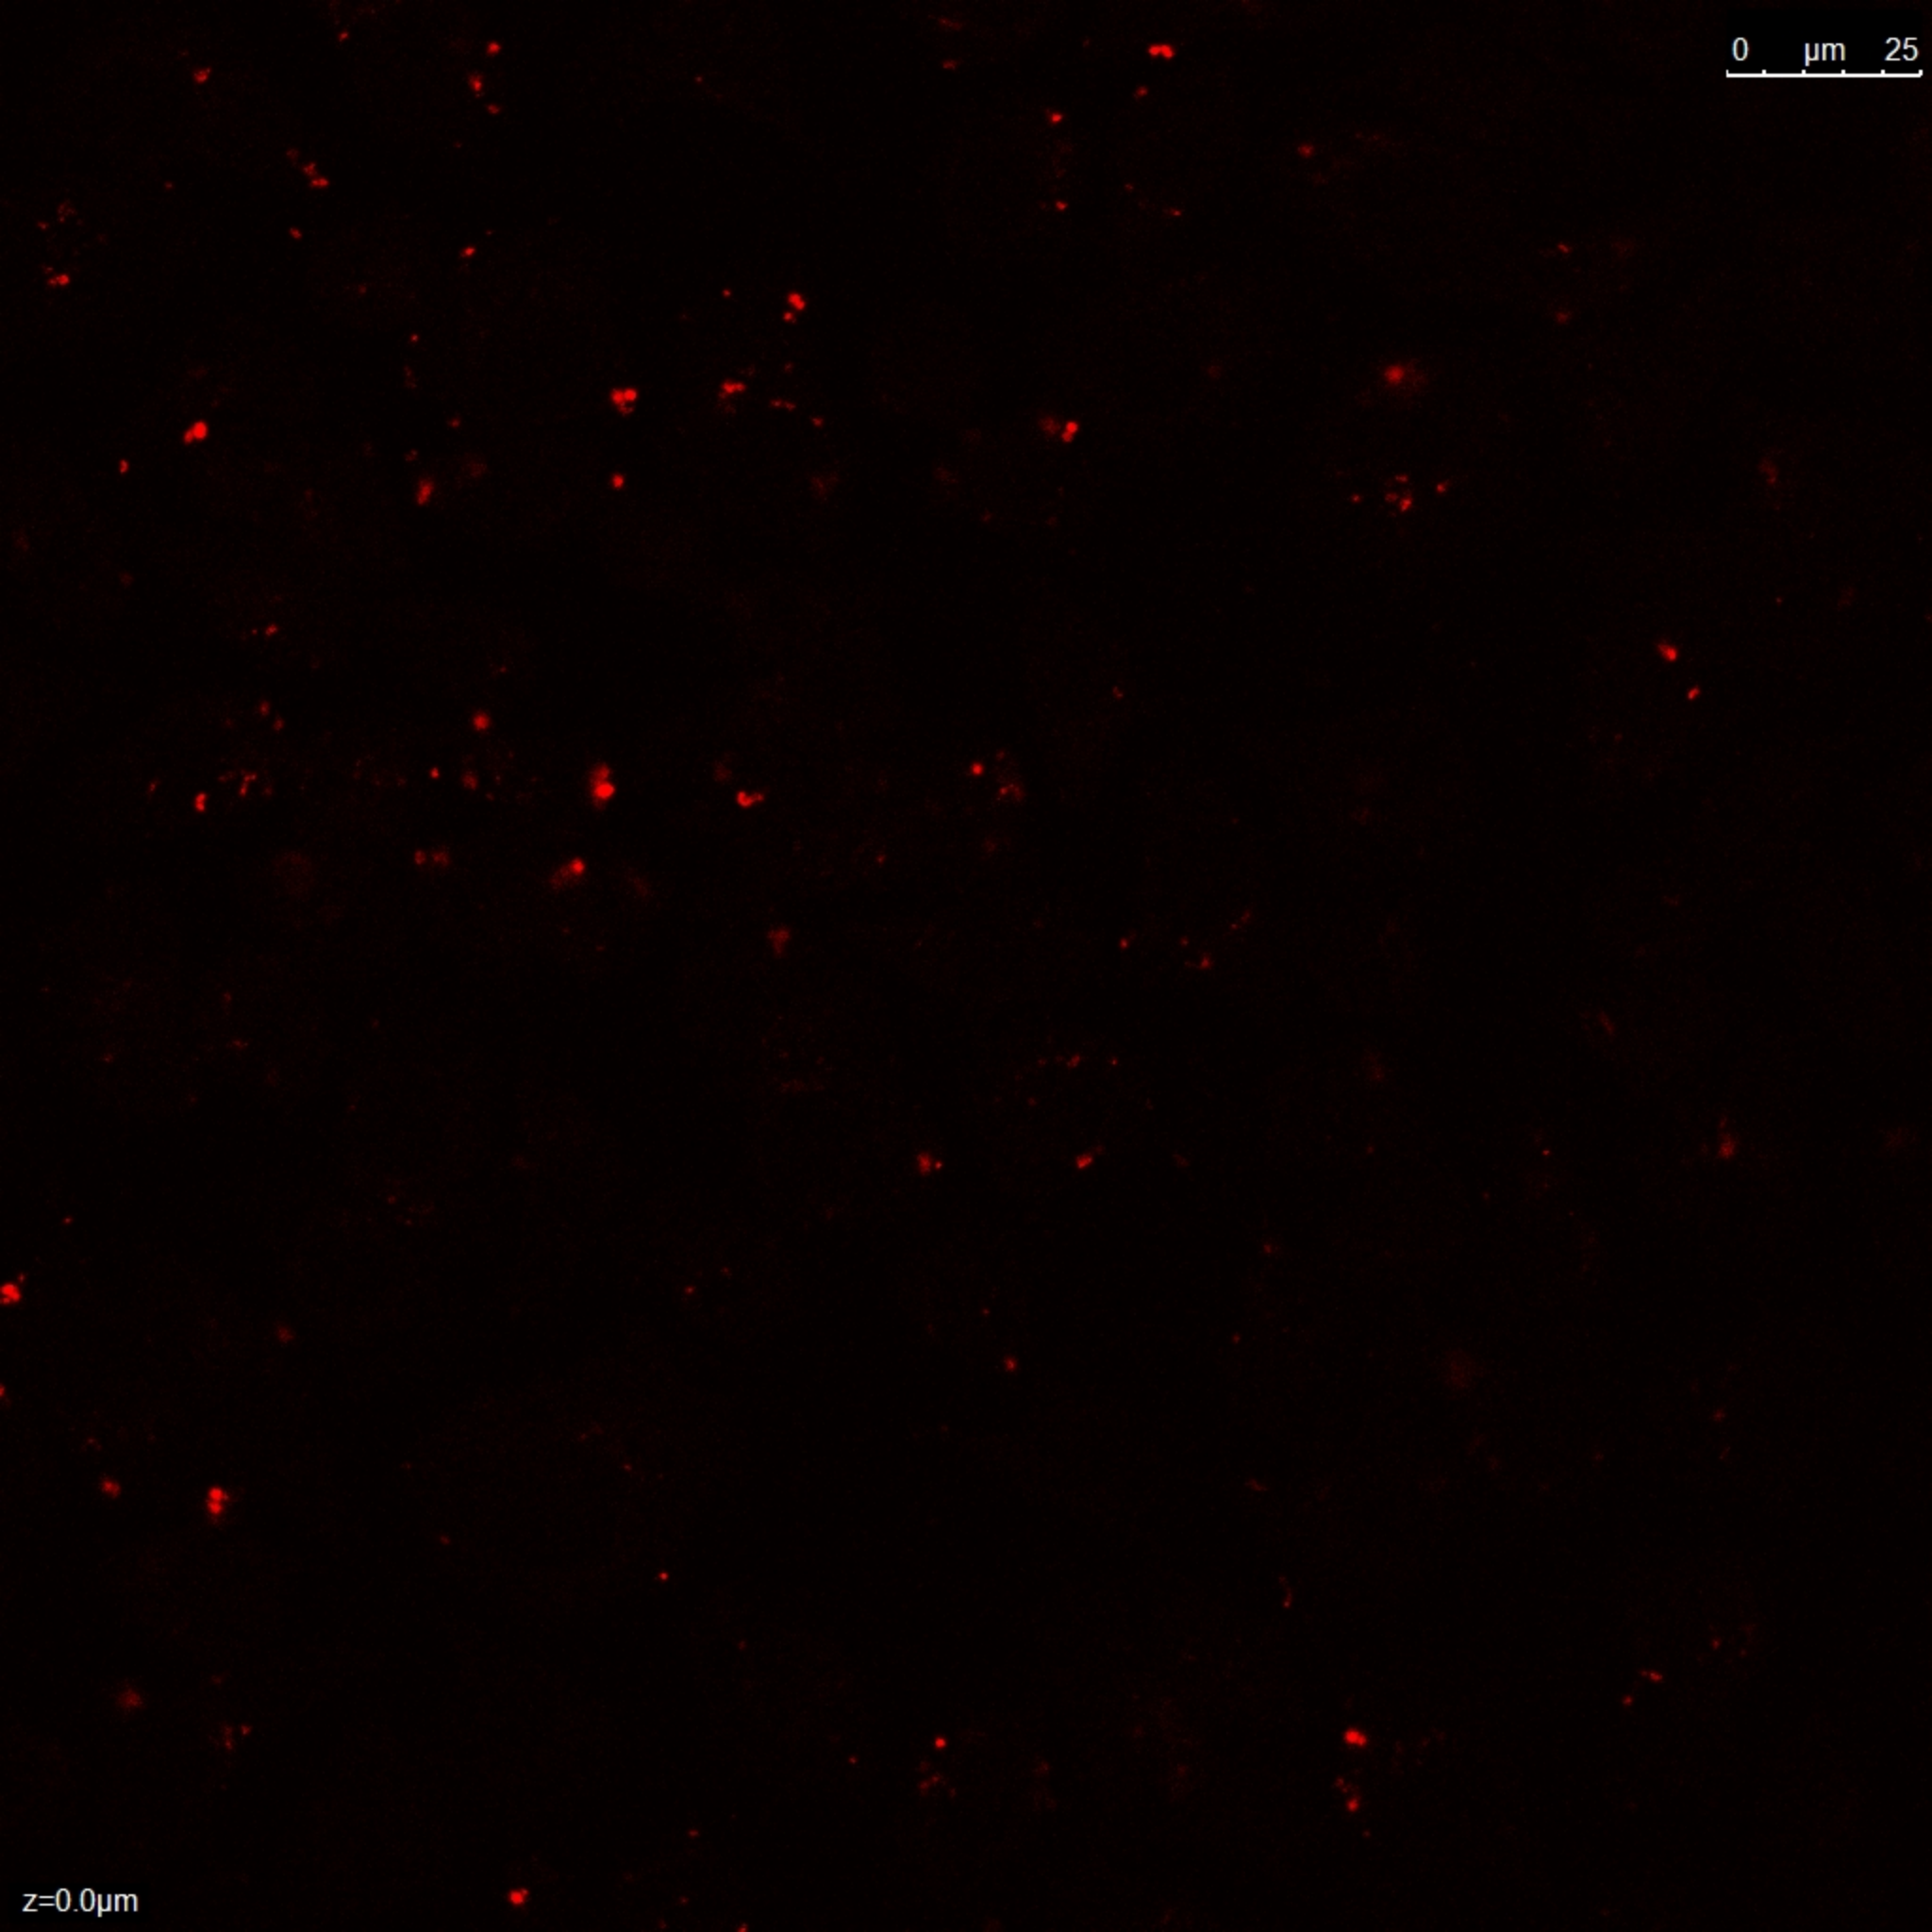

$z=0.0\mu\text{m}$

0  $\mu\text{m}$  25

$z=0.0\mu\text{m}$

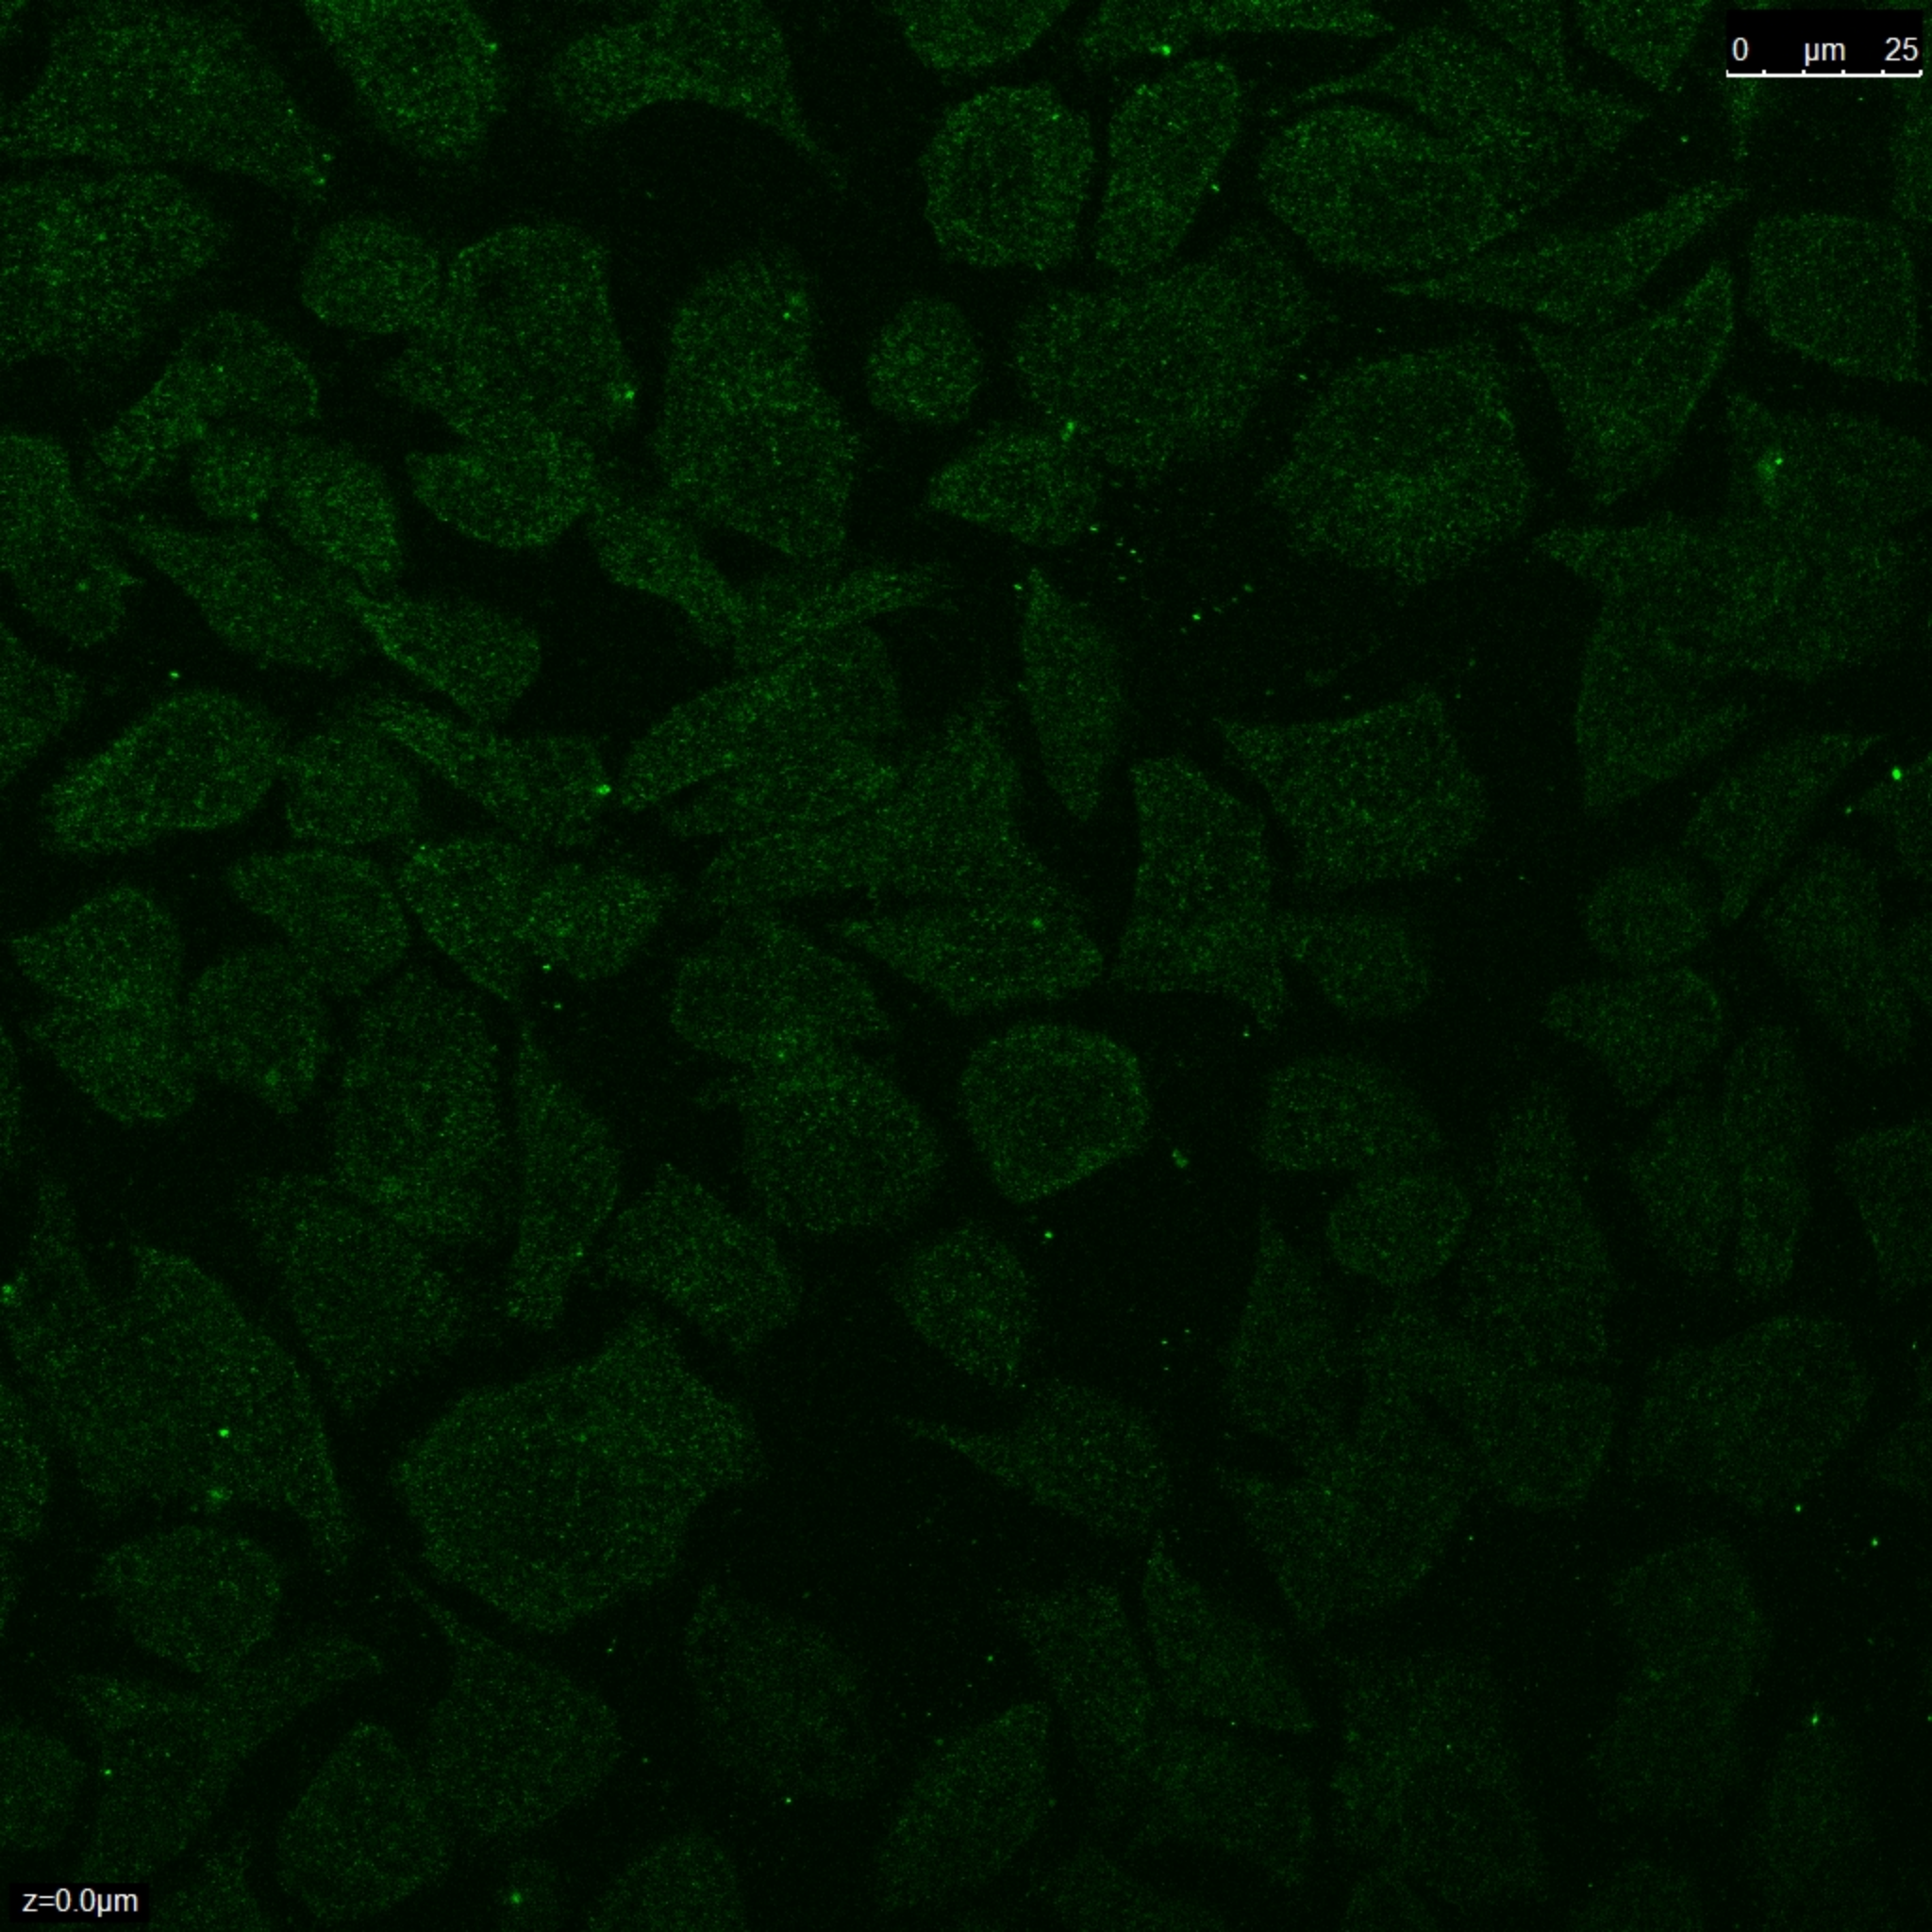

0  $\mu\text{m}$  25

$z=0.0\mu\text{m}$

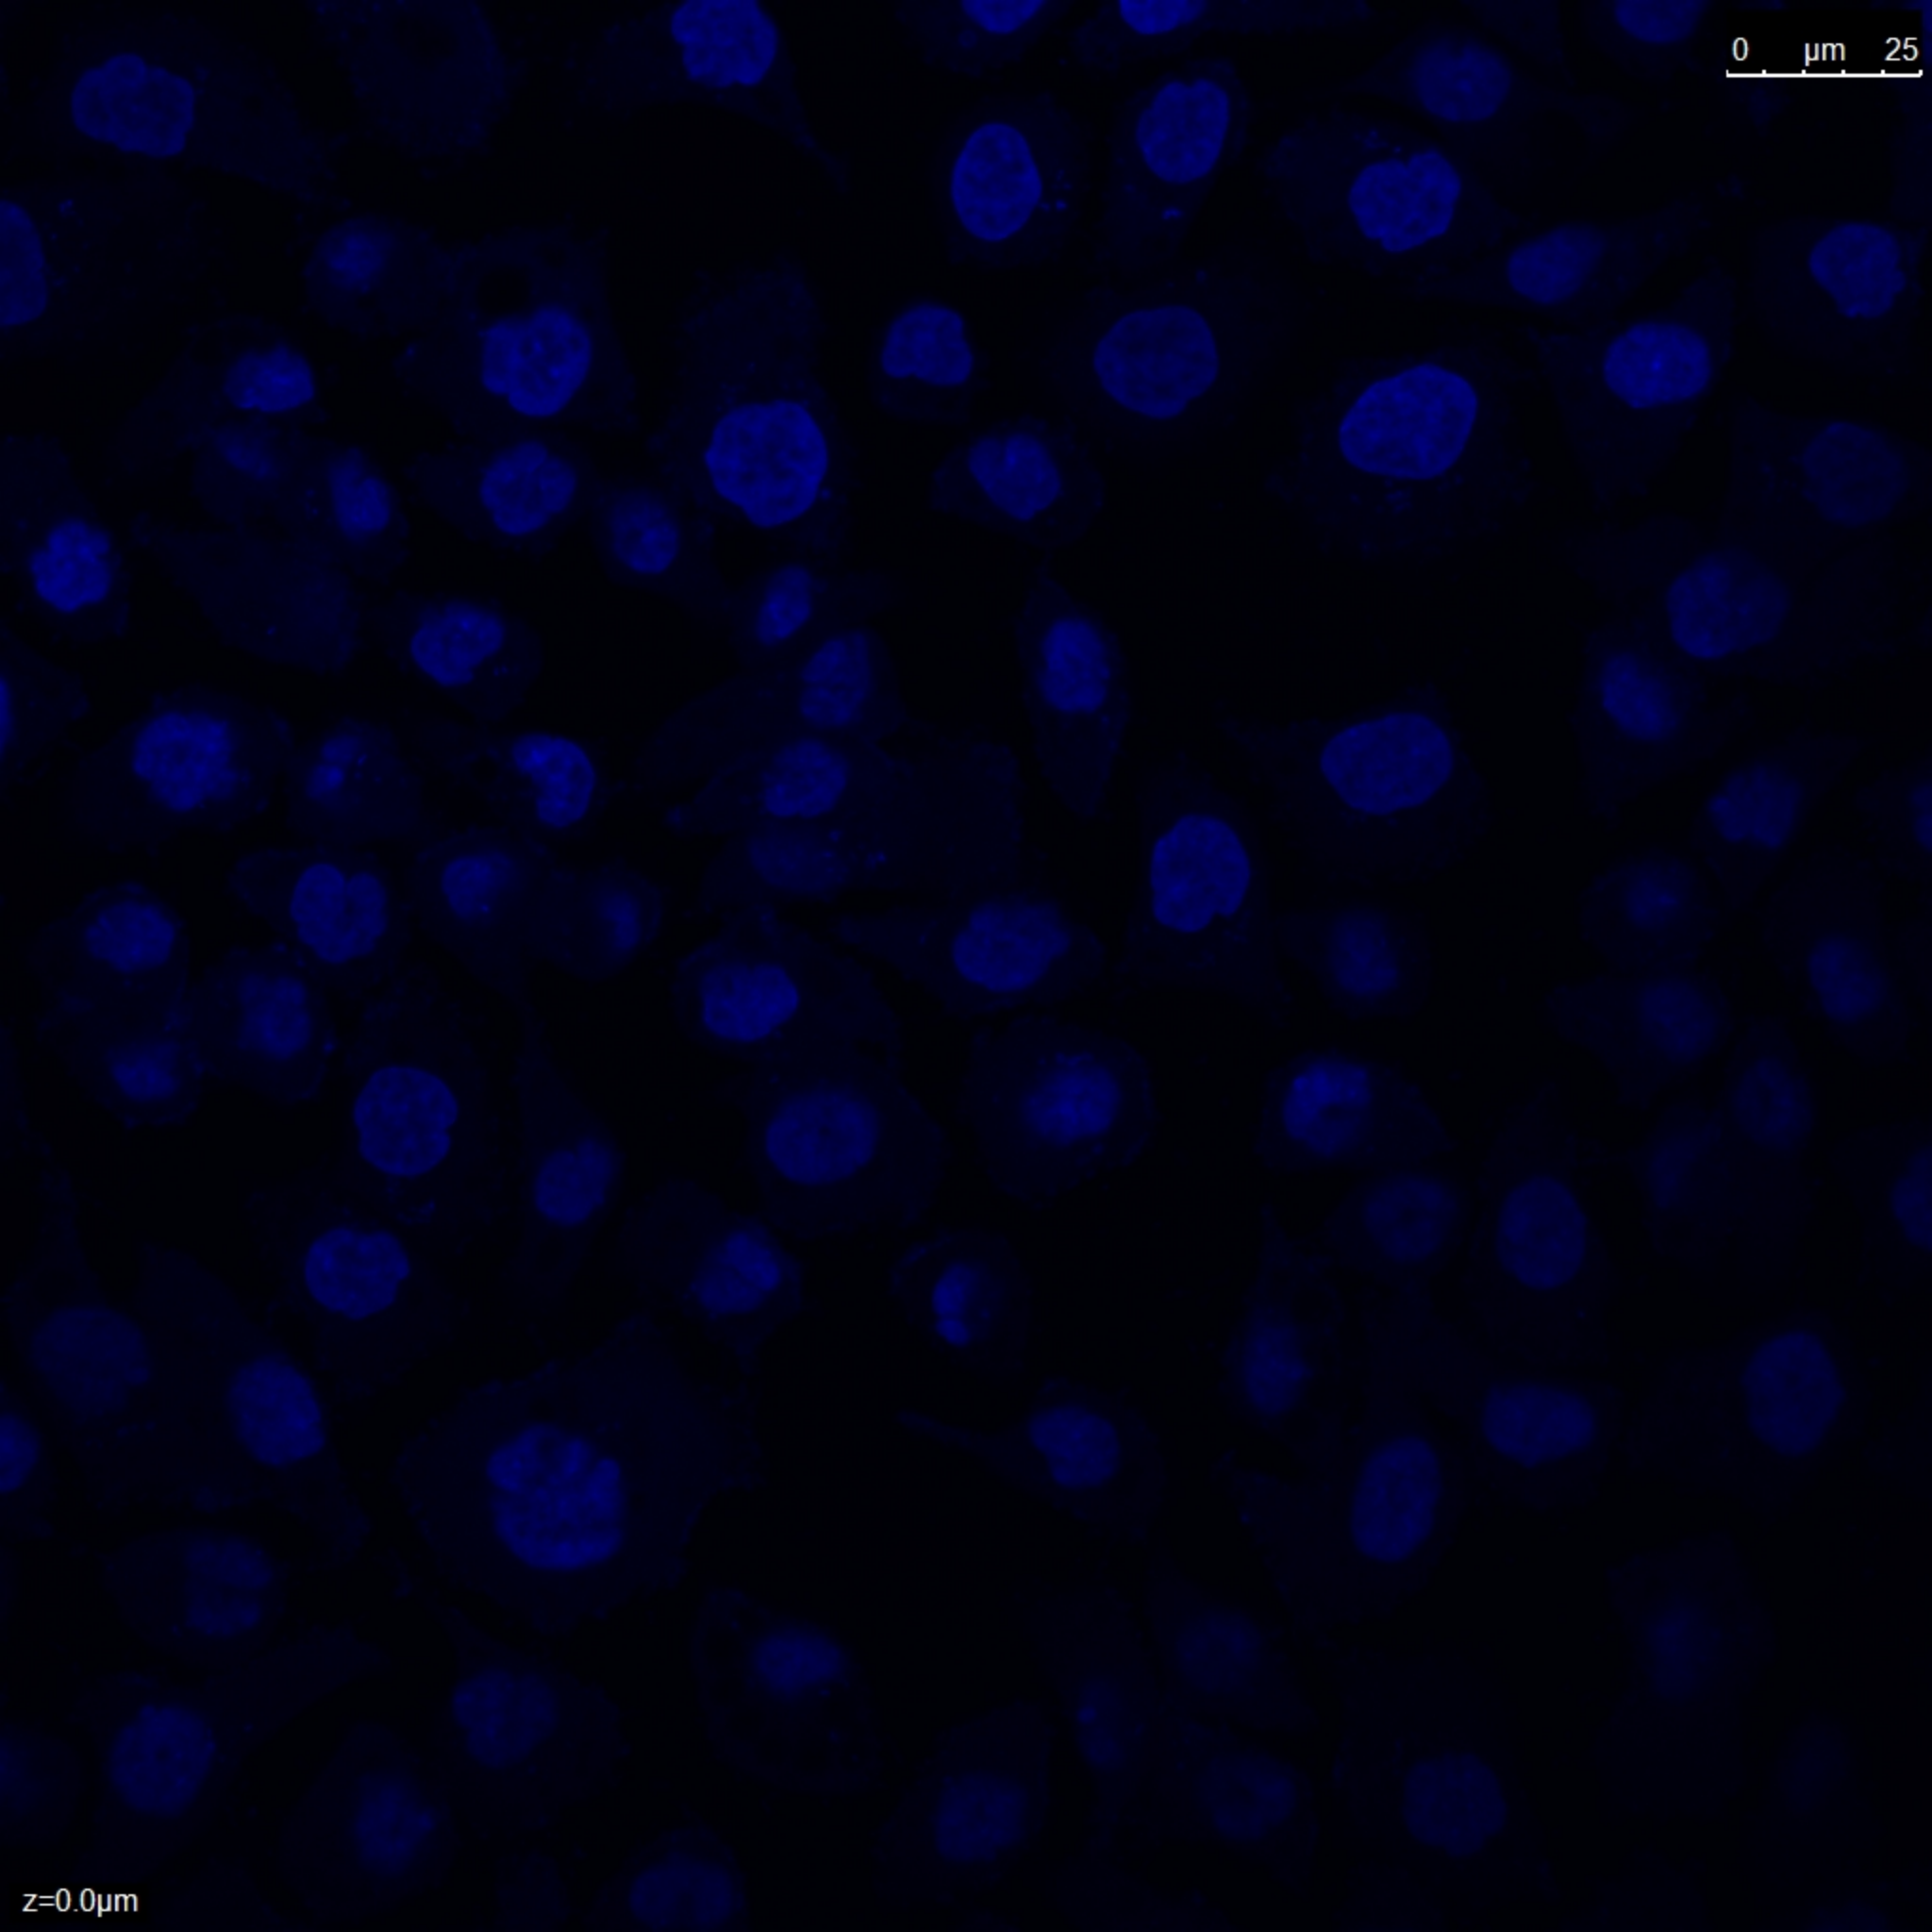

0  $\mu\text{m}$  25

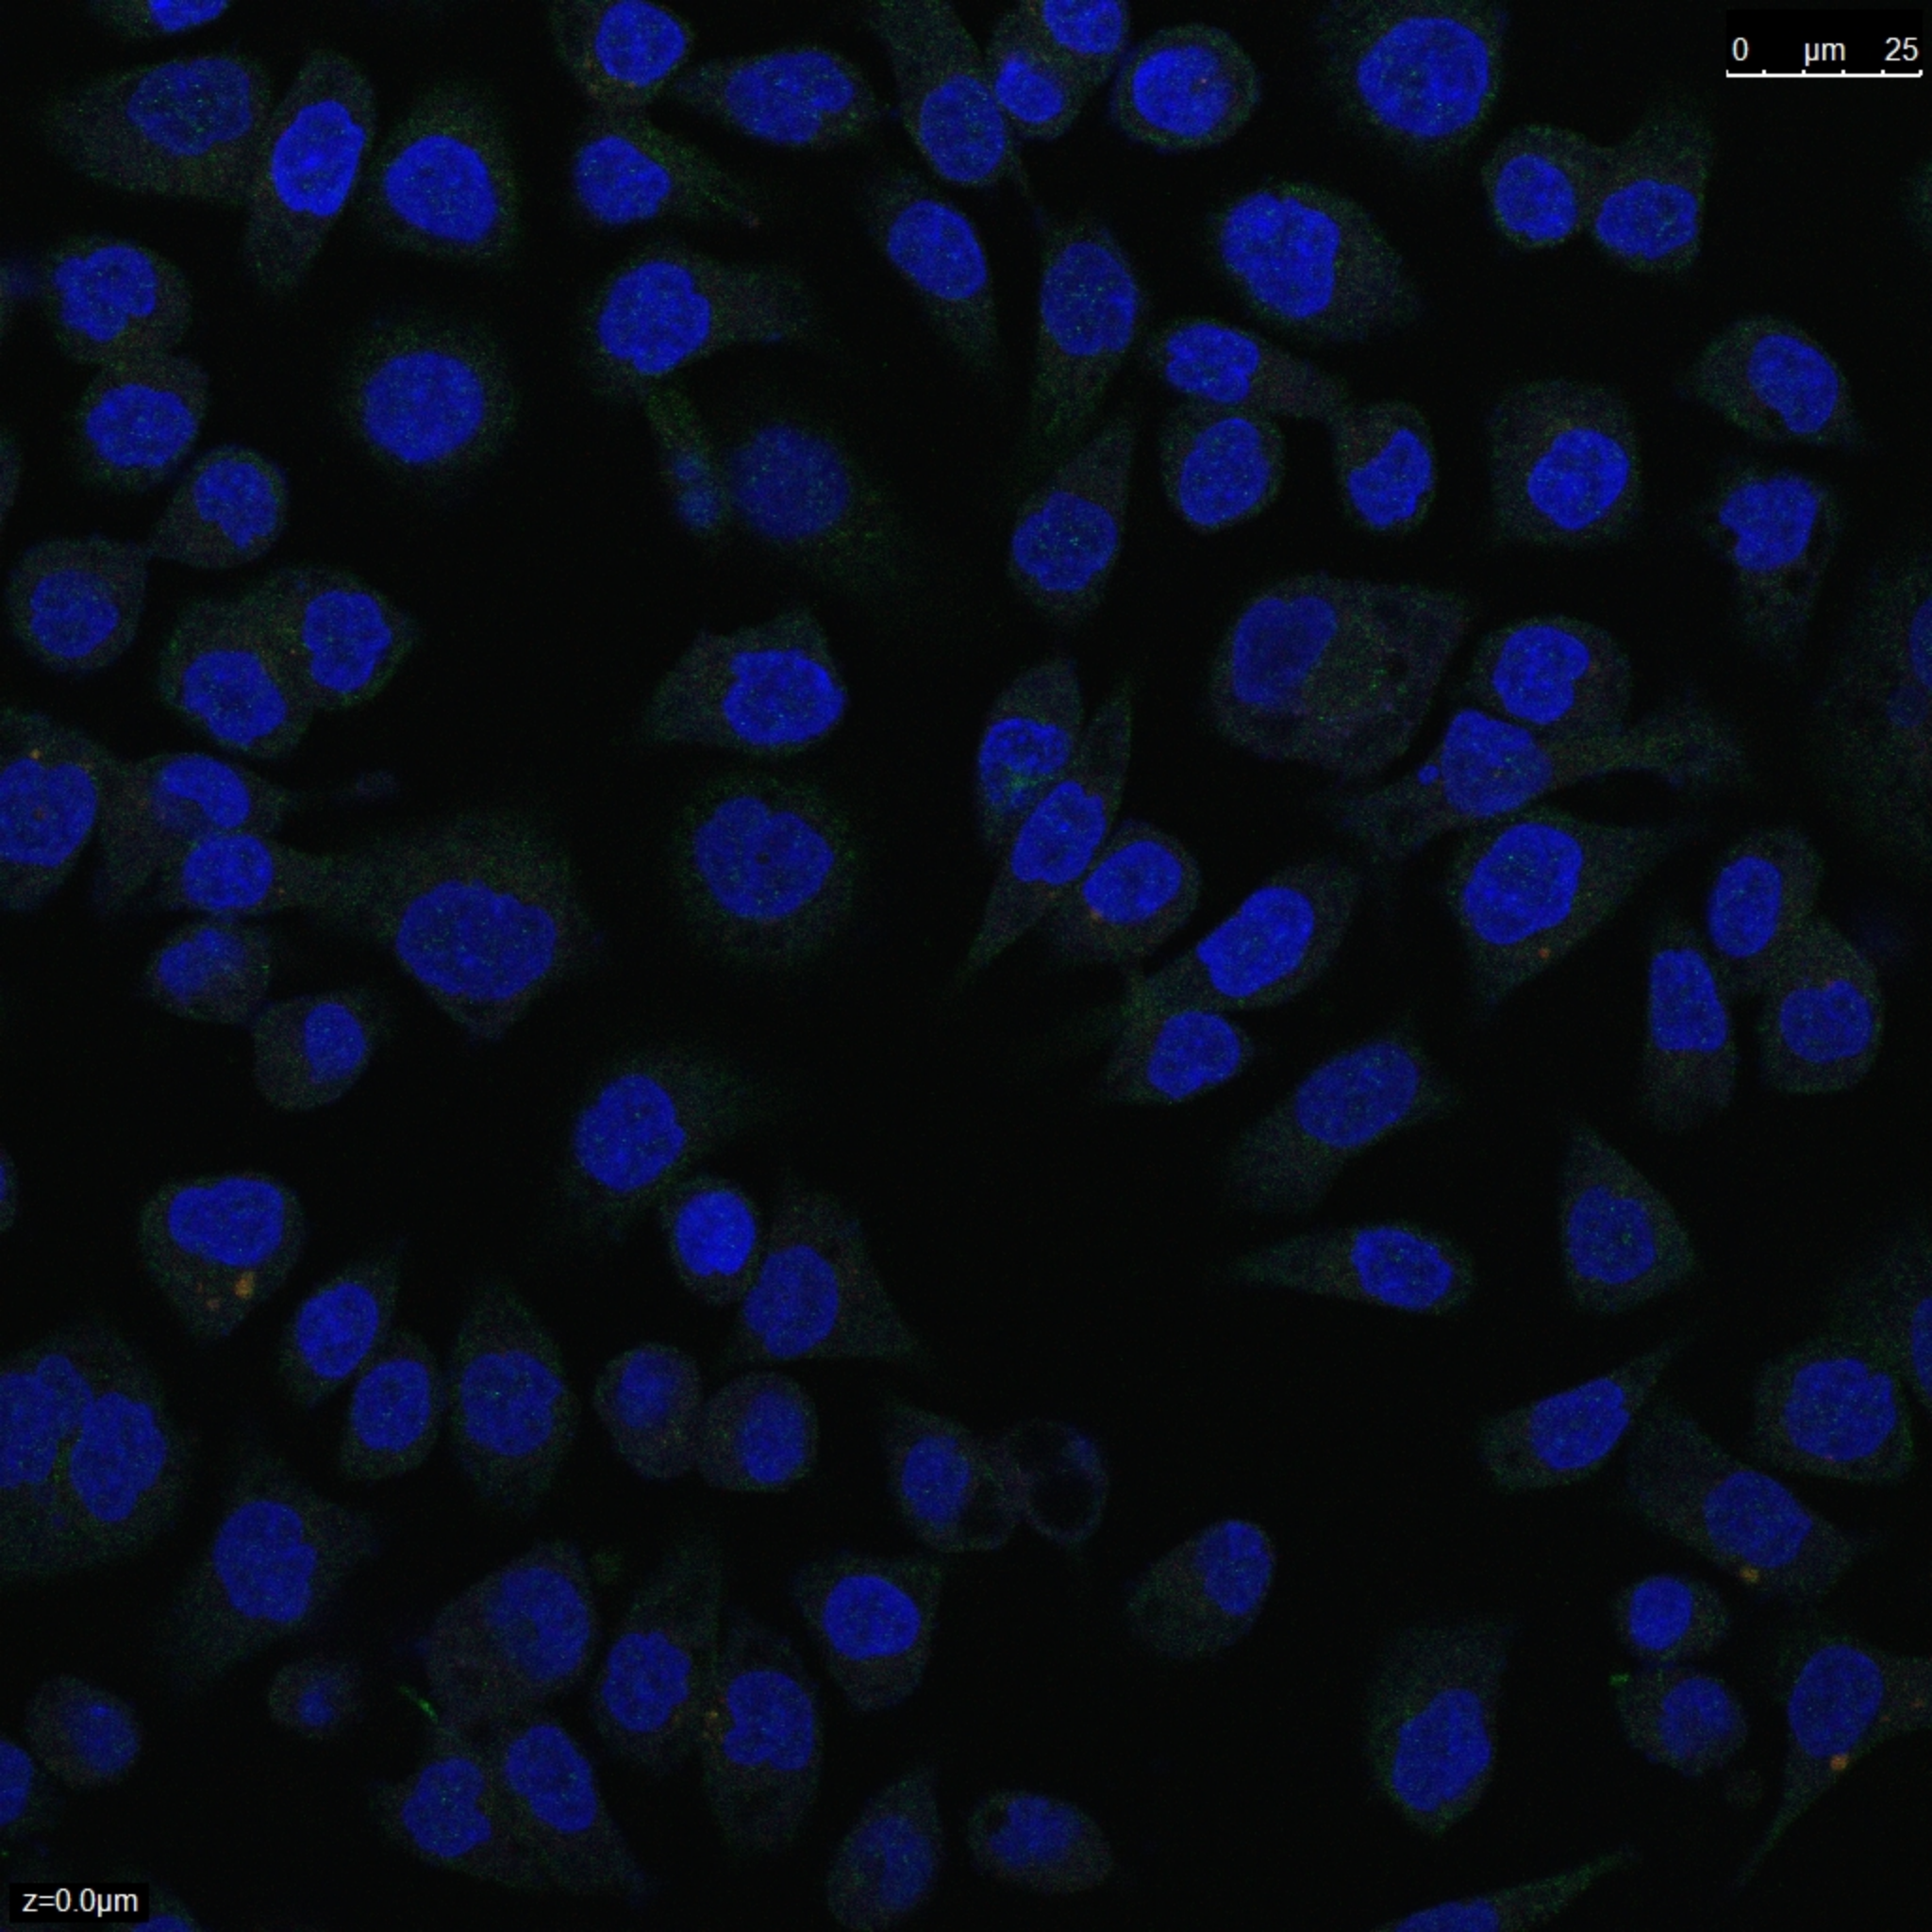

$z=0.0\mu\text{m}$

0  $\mu\text{m}$  25

$z=0.0\mu\text{m}$

0  $\mu\text{m}$  25

$z=0.0\mu\text{m}$

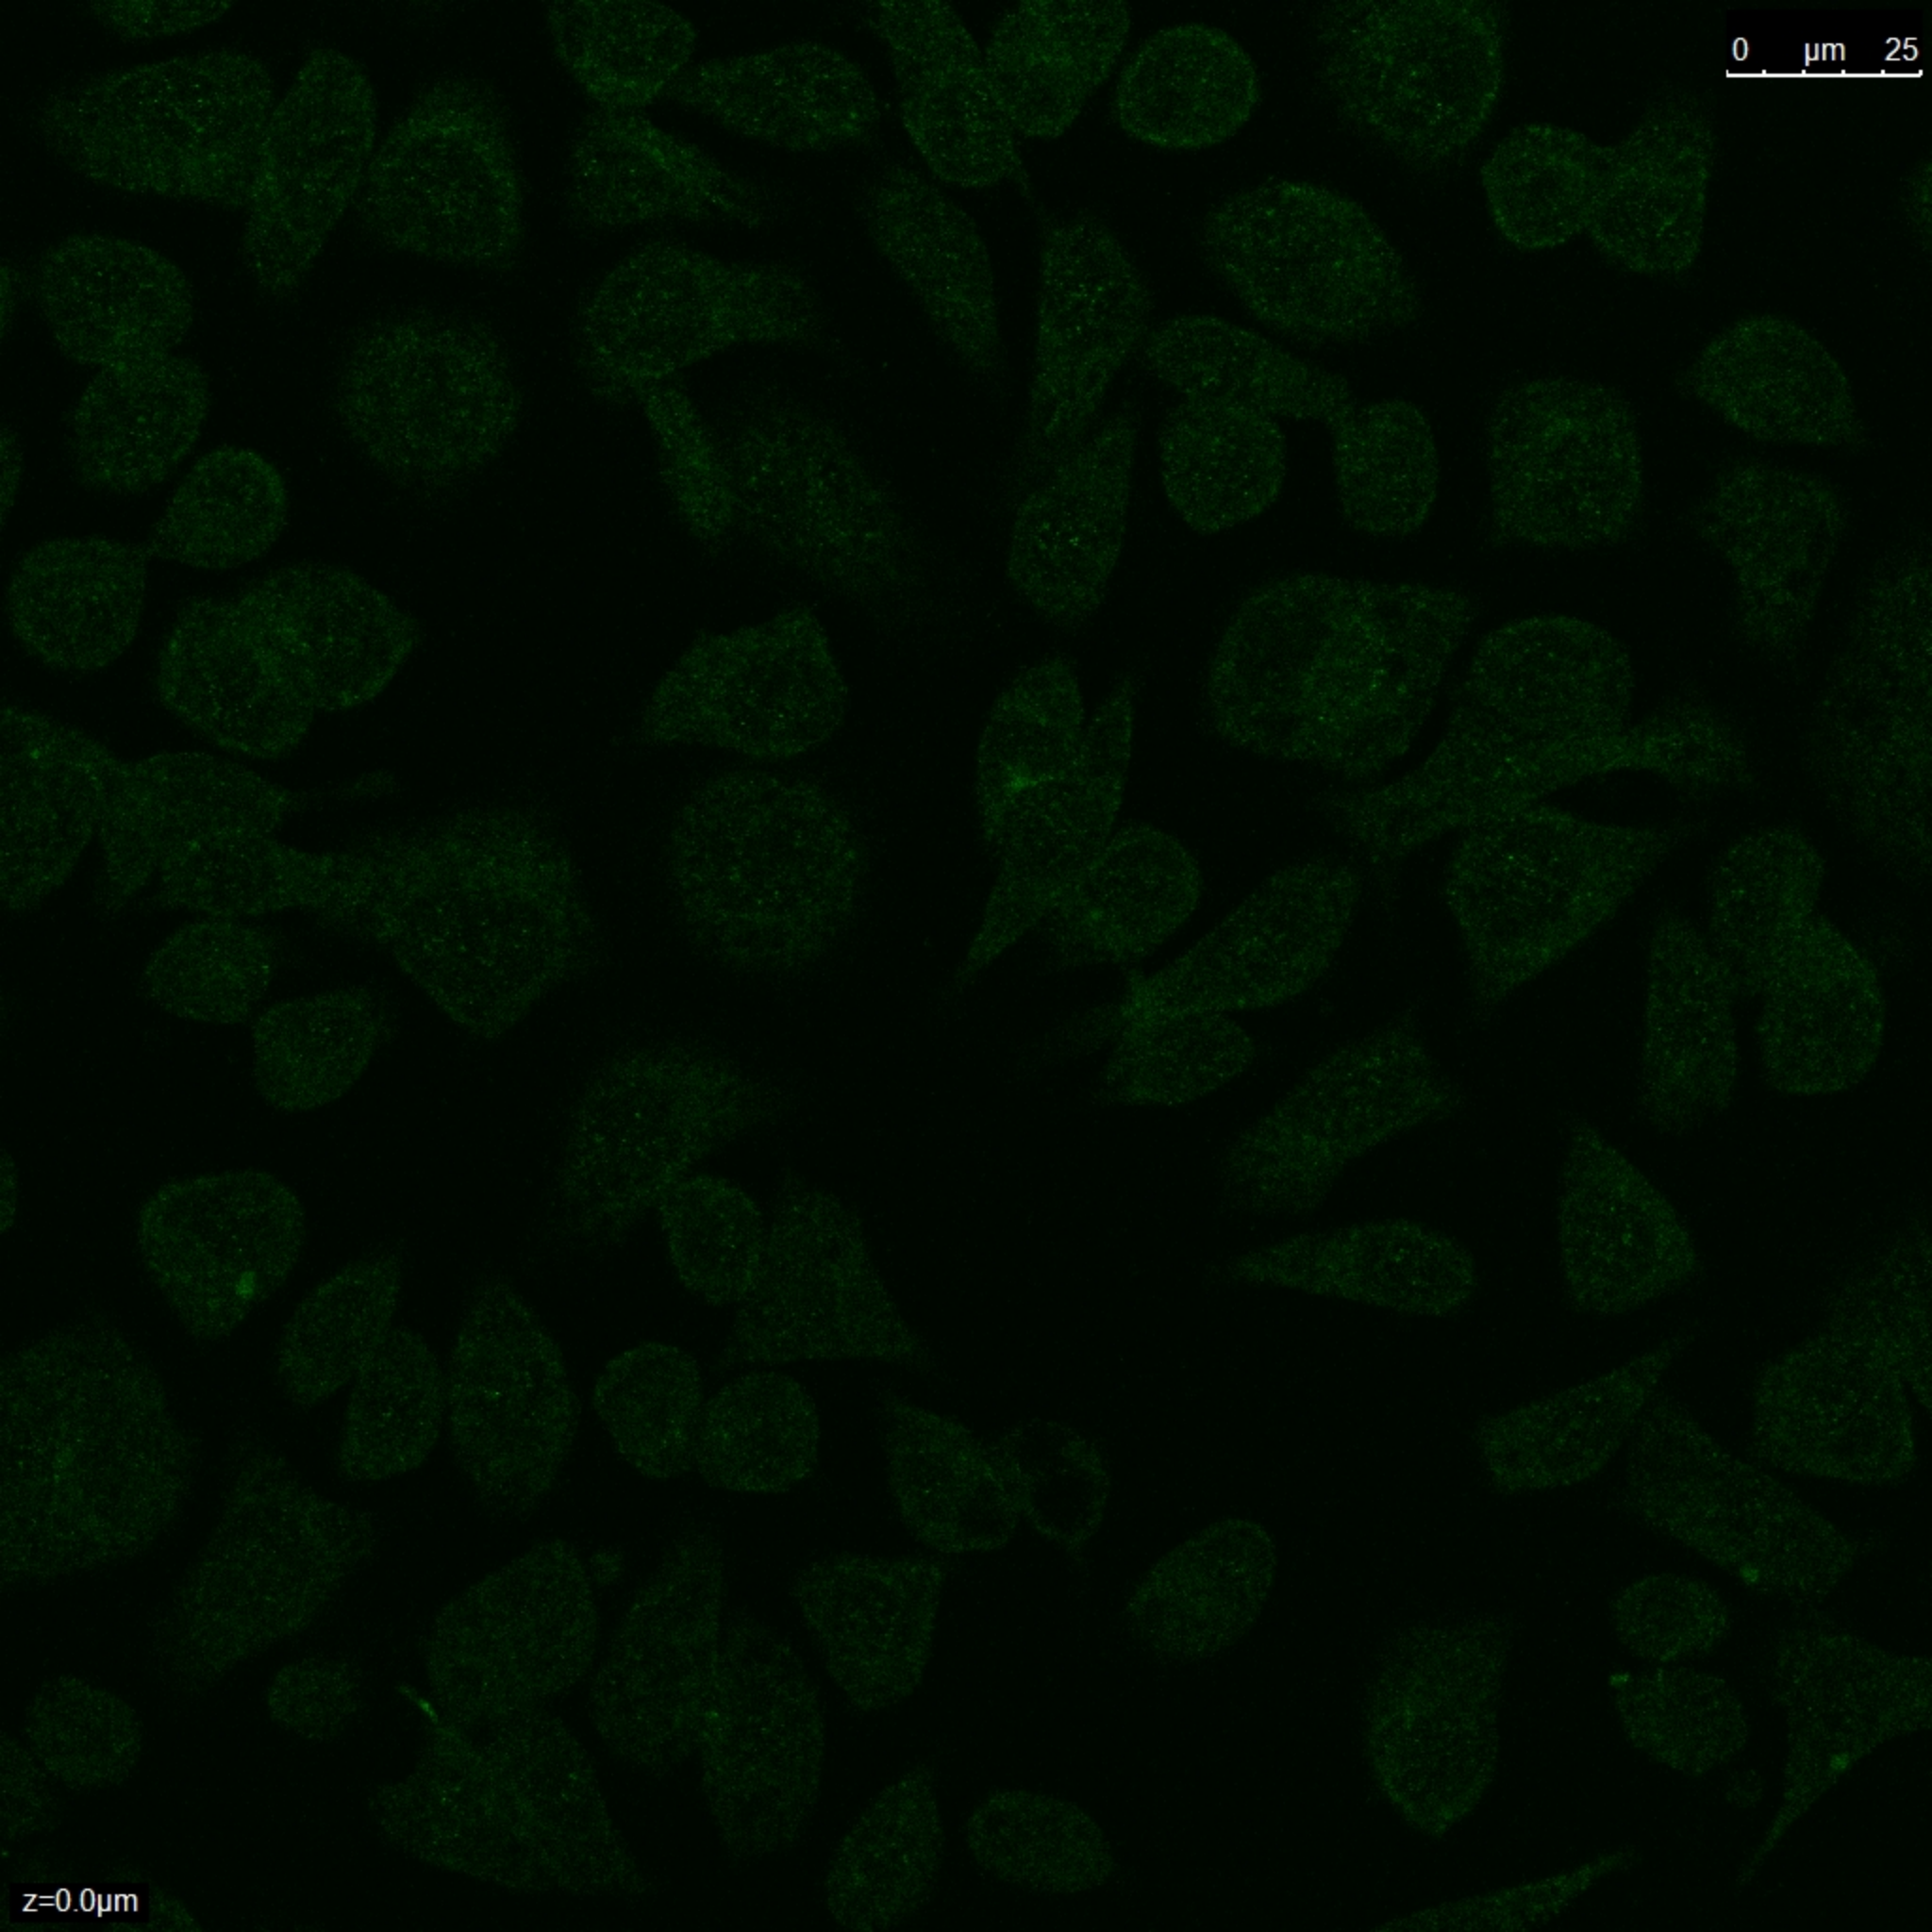

0  $\mu\text{m}$  25

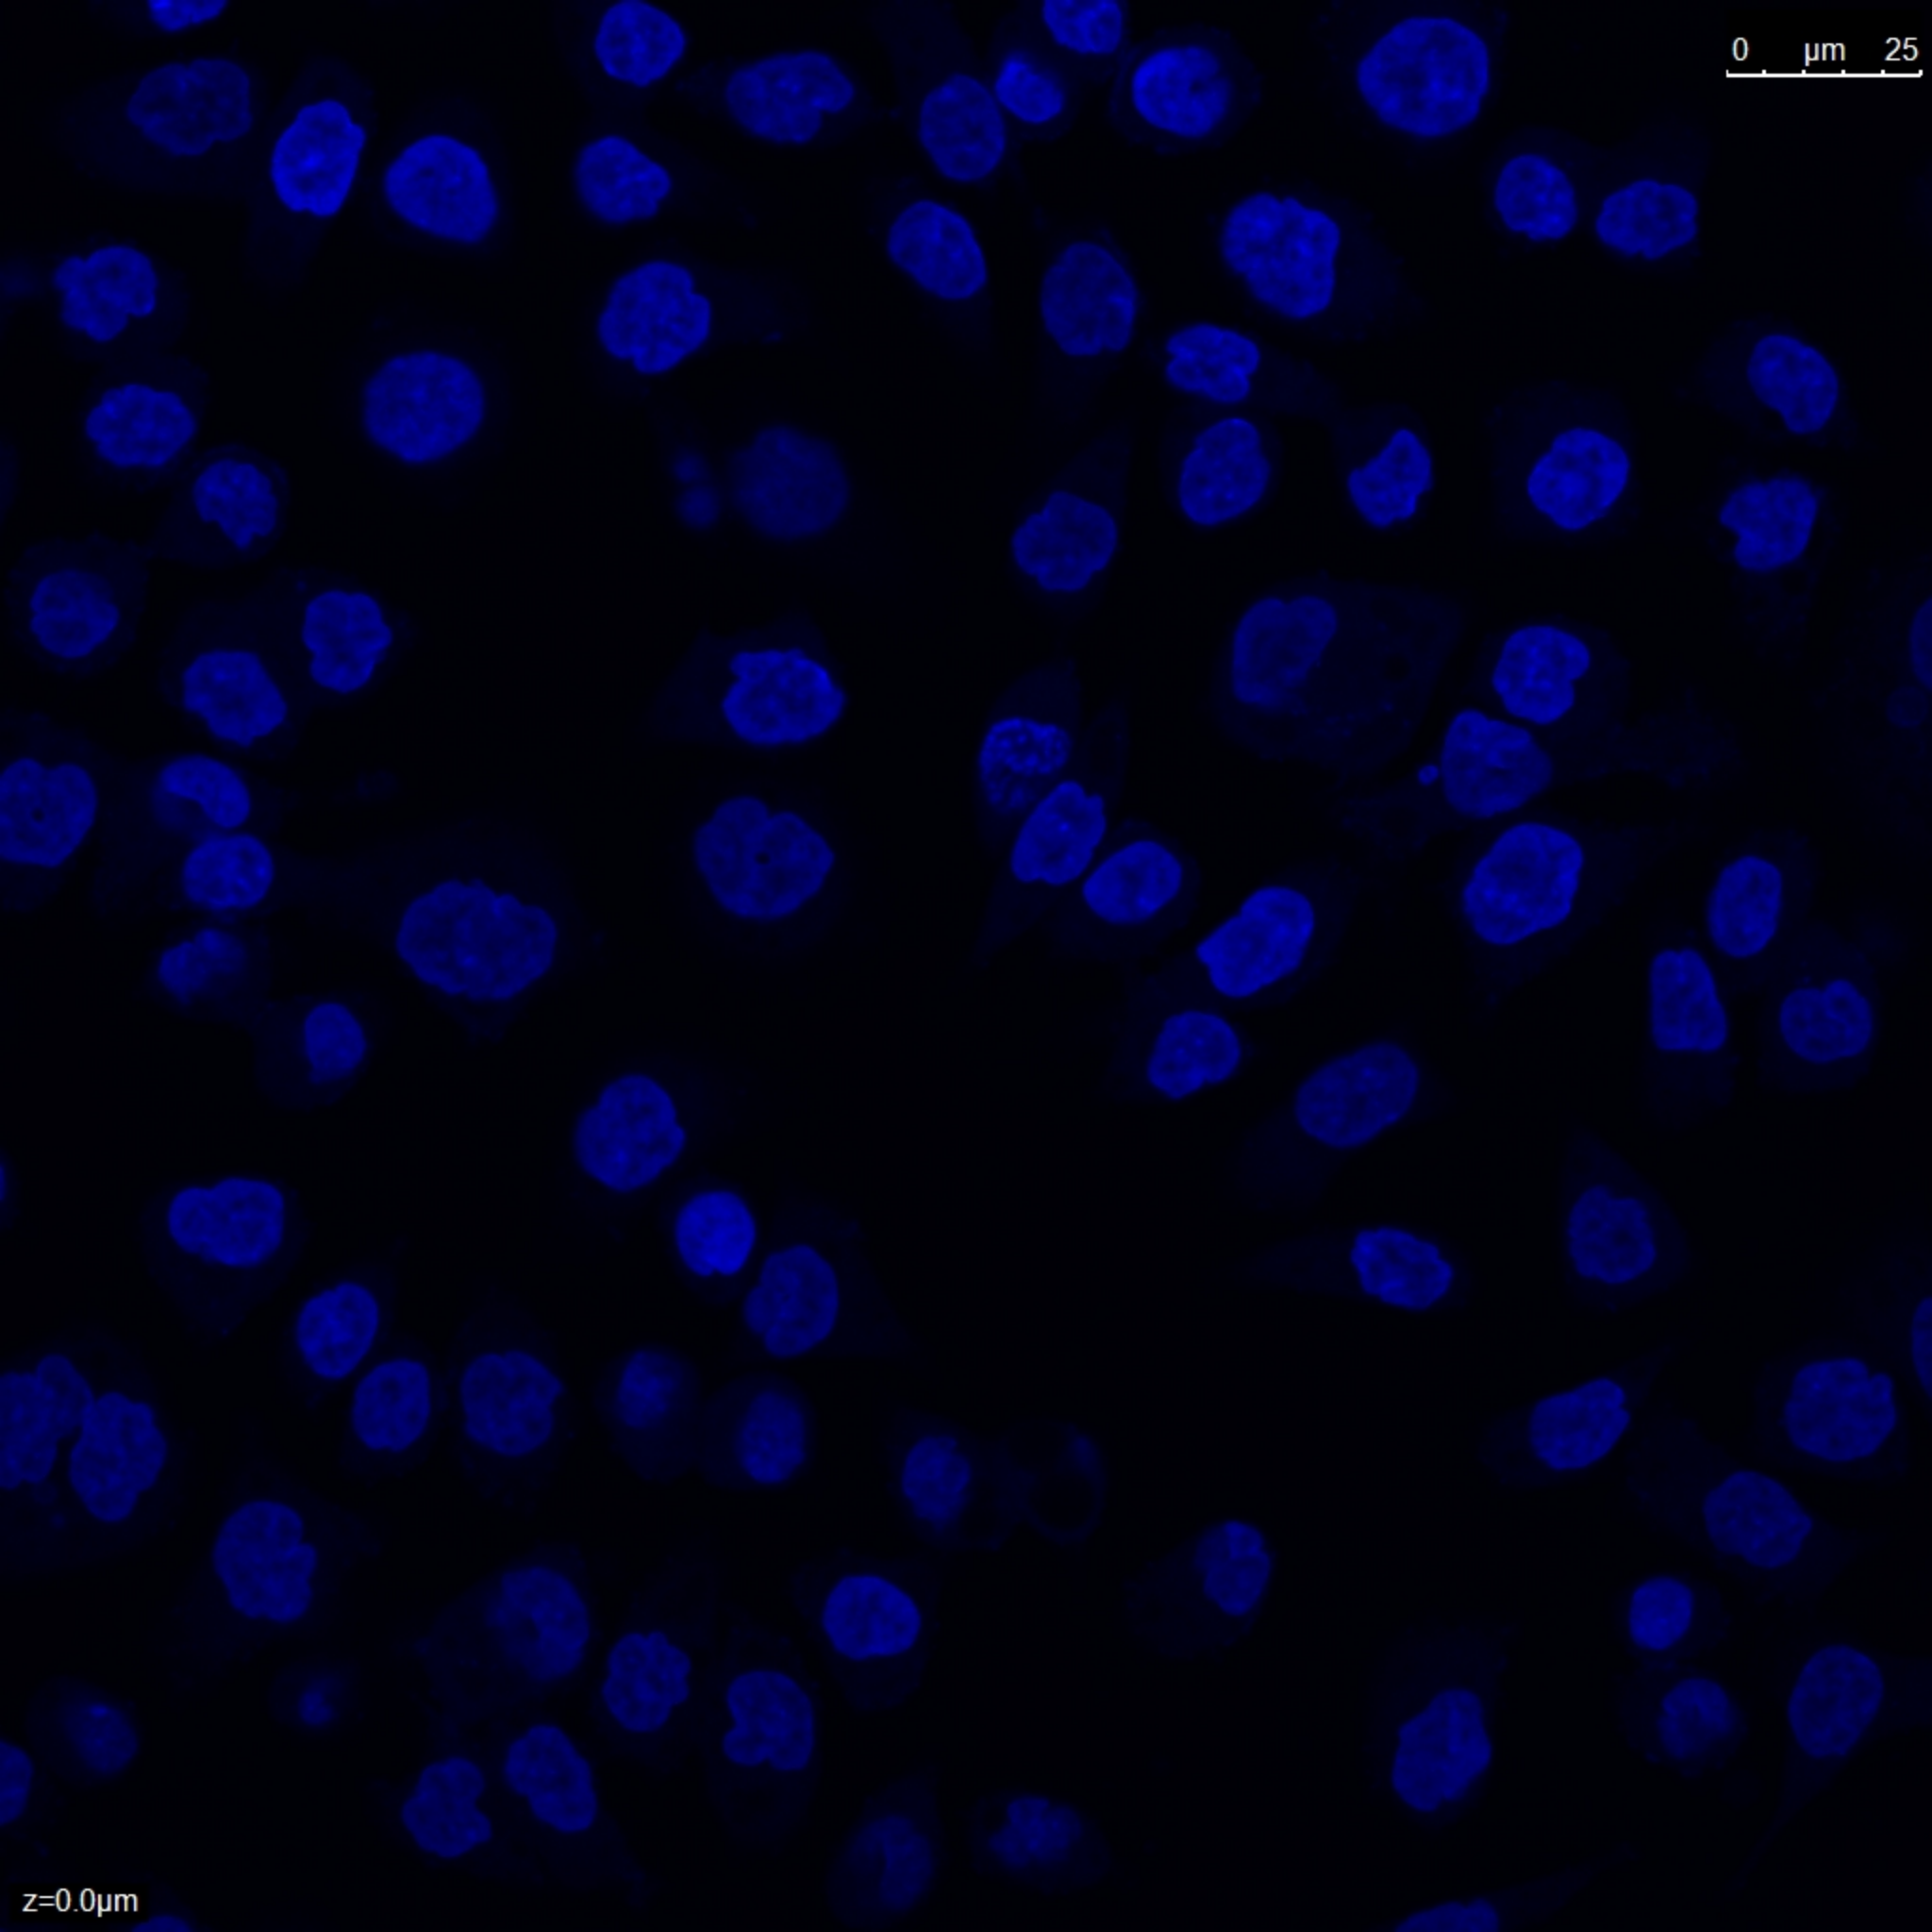

$z=0.0\mu\text{m}$



0  $\mu\text{m}$  25

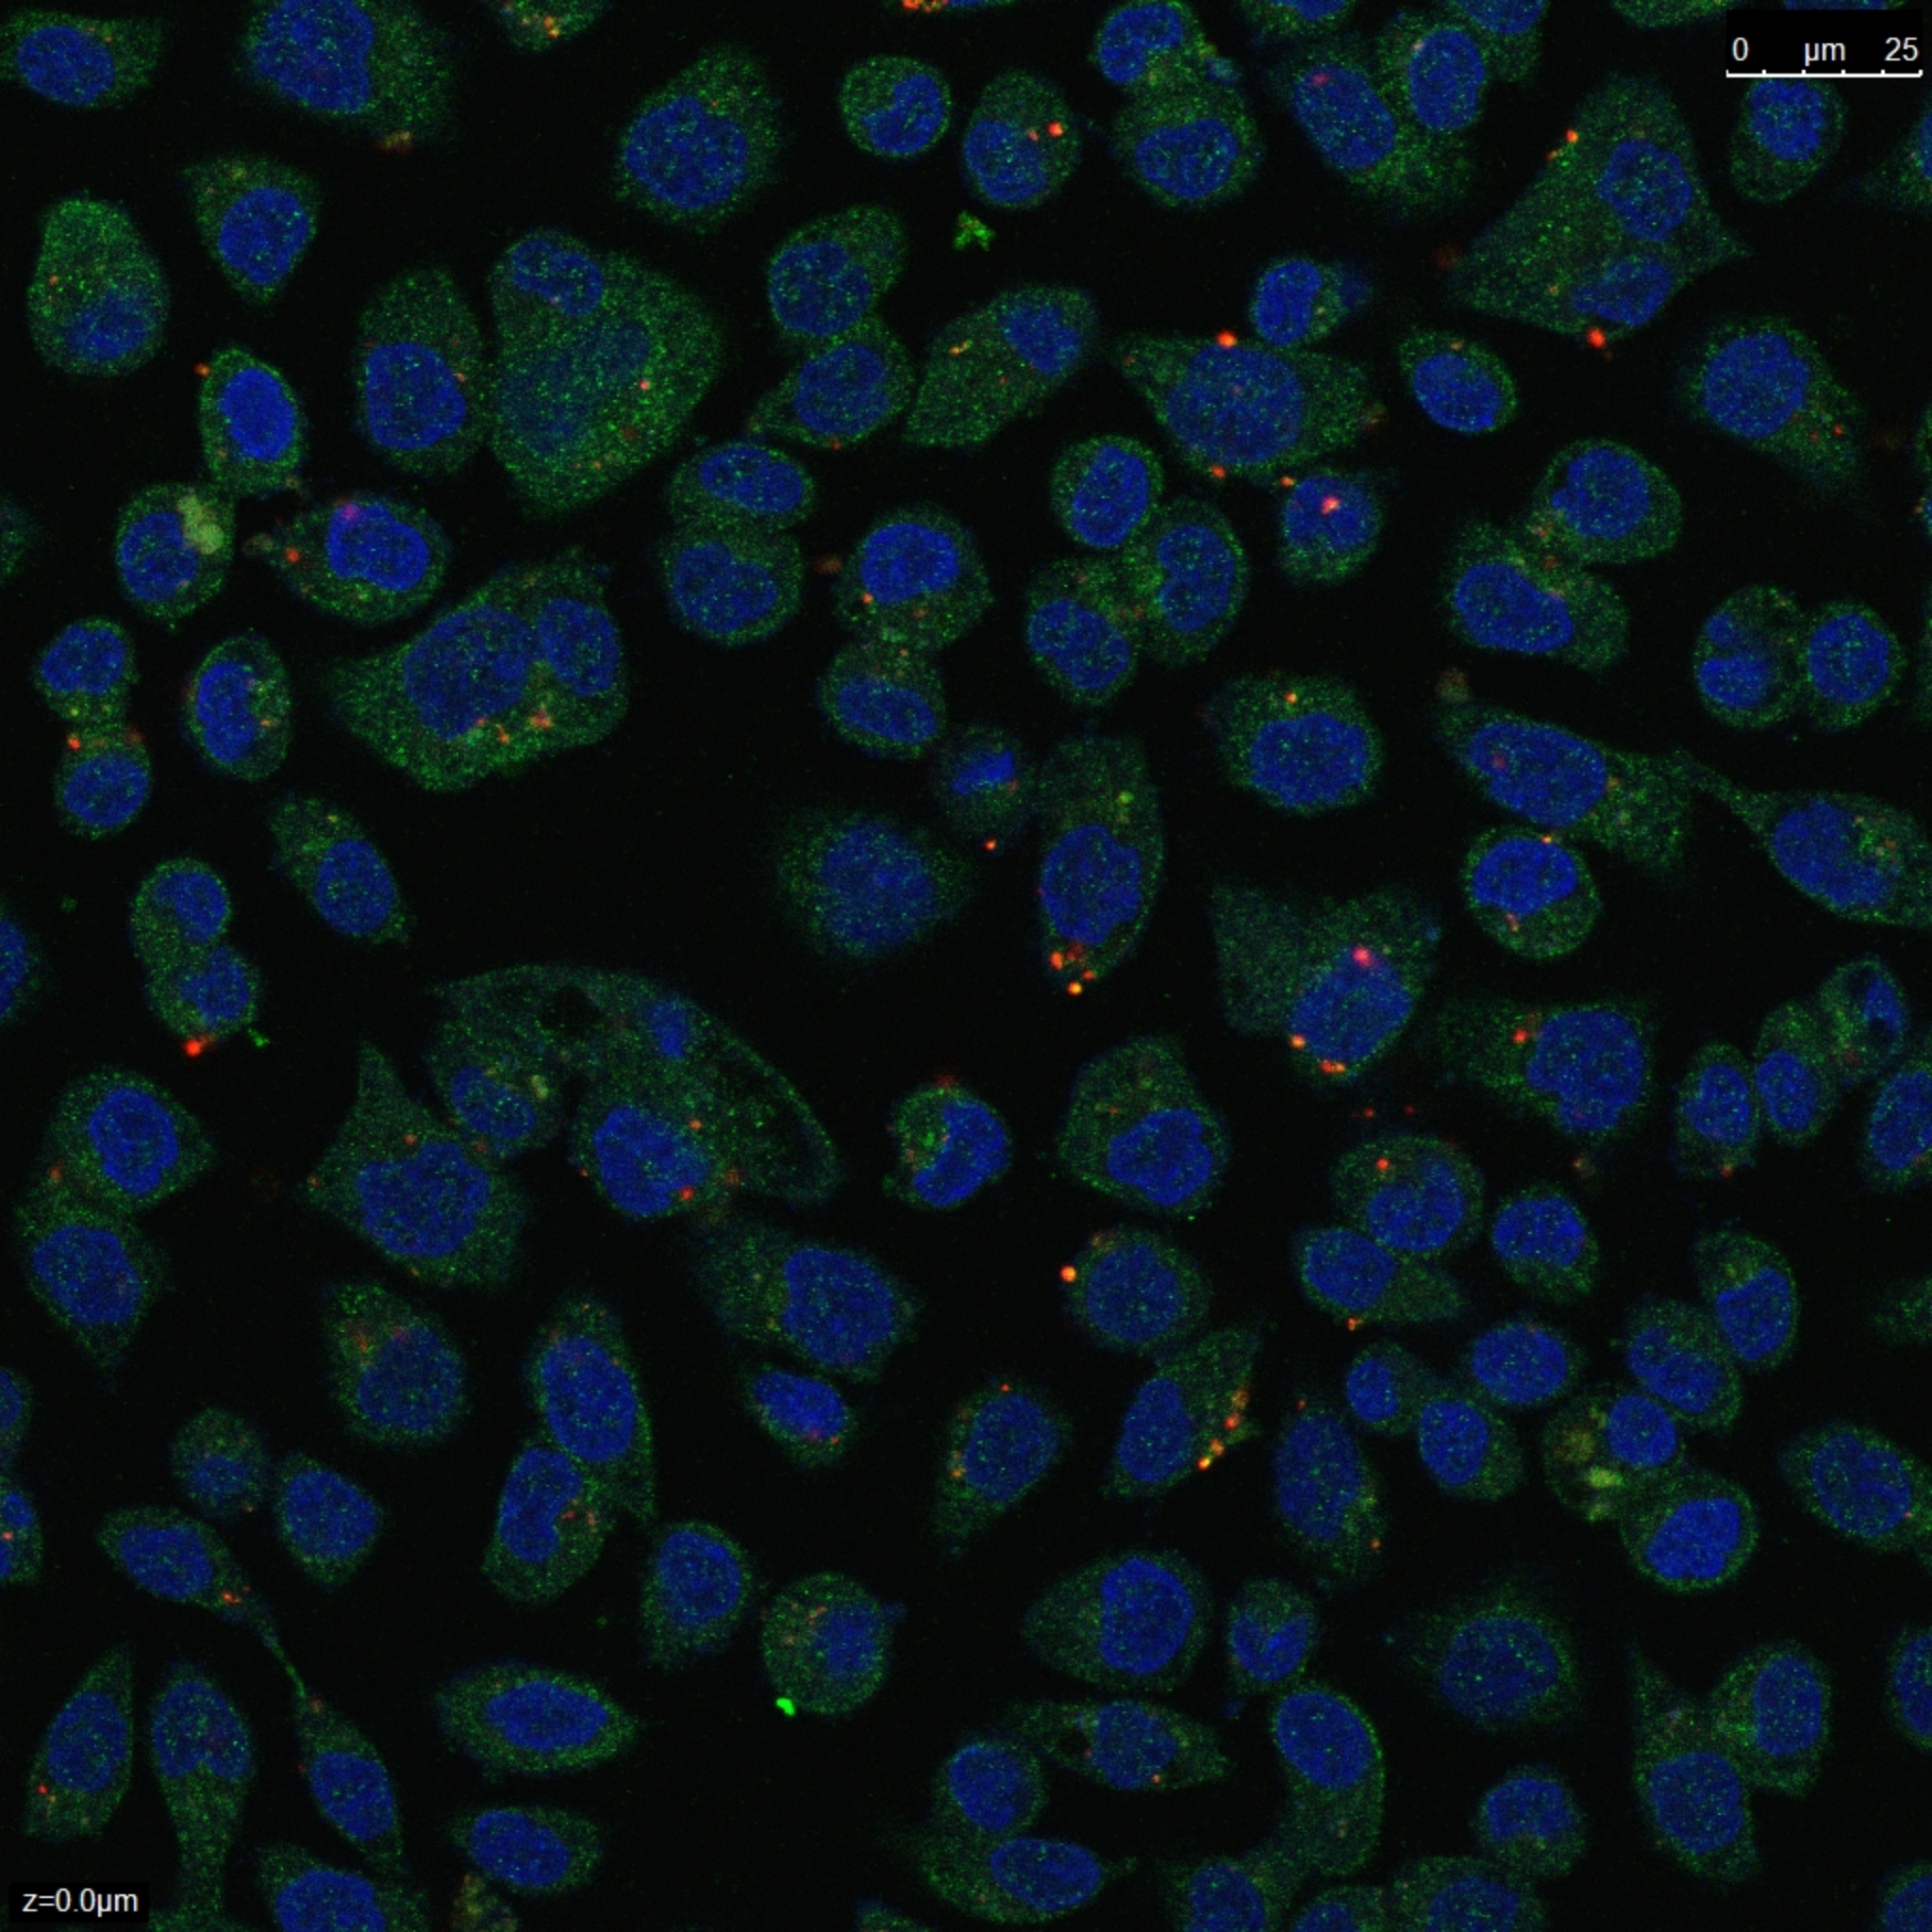

z=0.0µm

0  $\mu\text{m}$  25

$z=0.0\mu\text{m}$

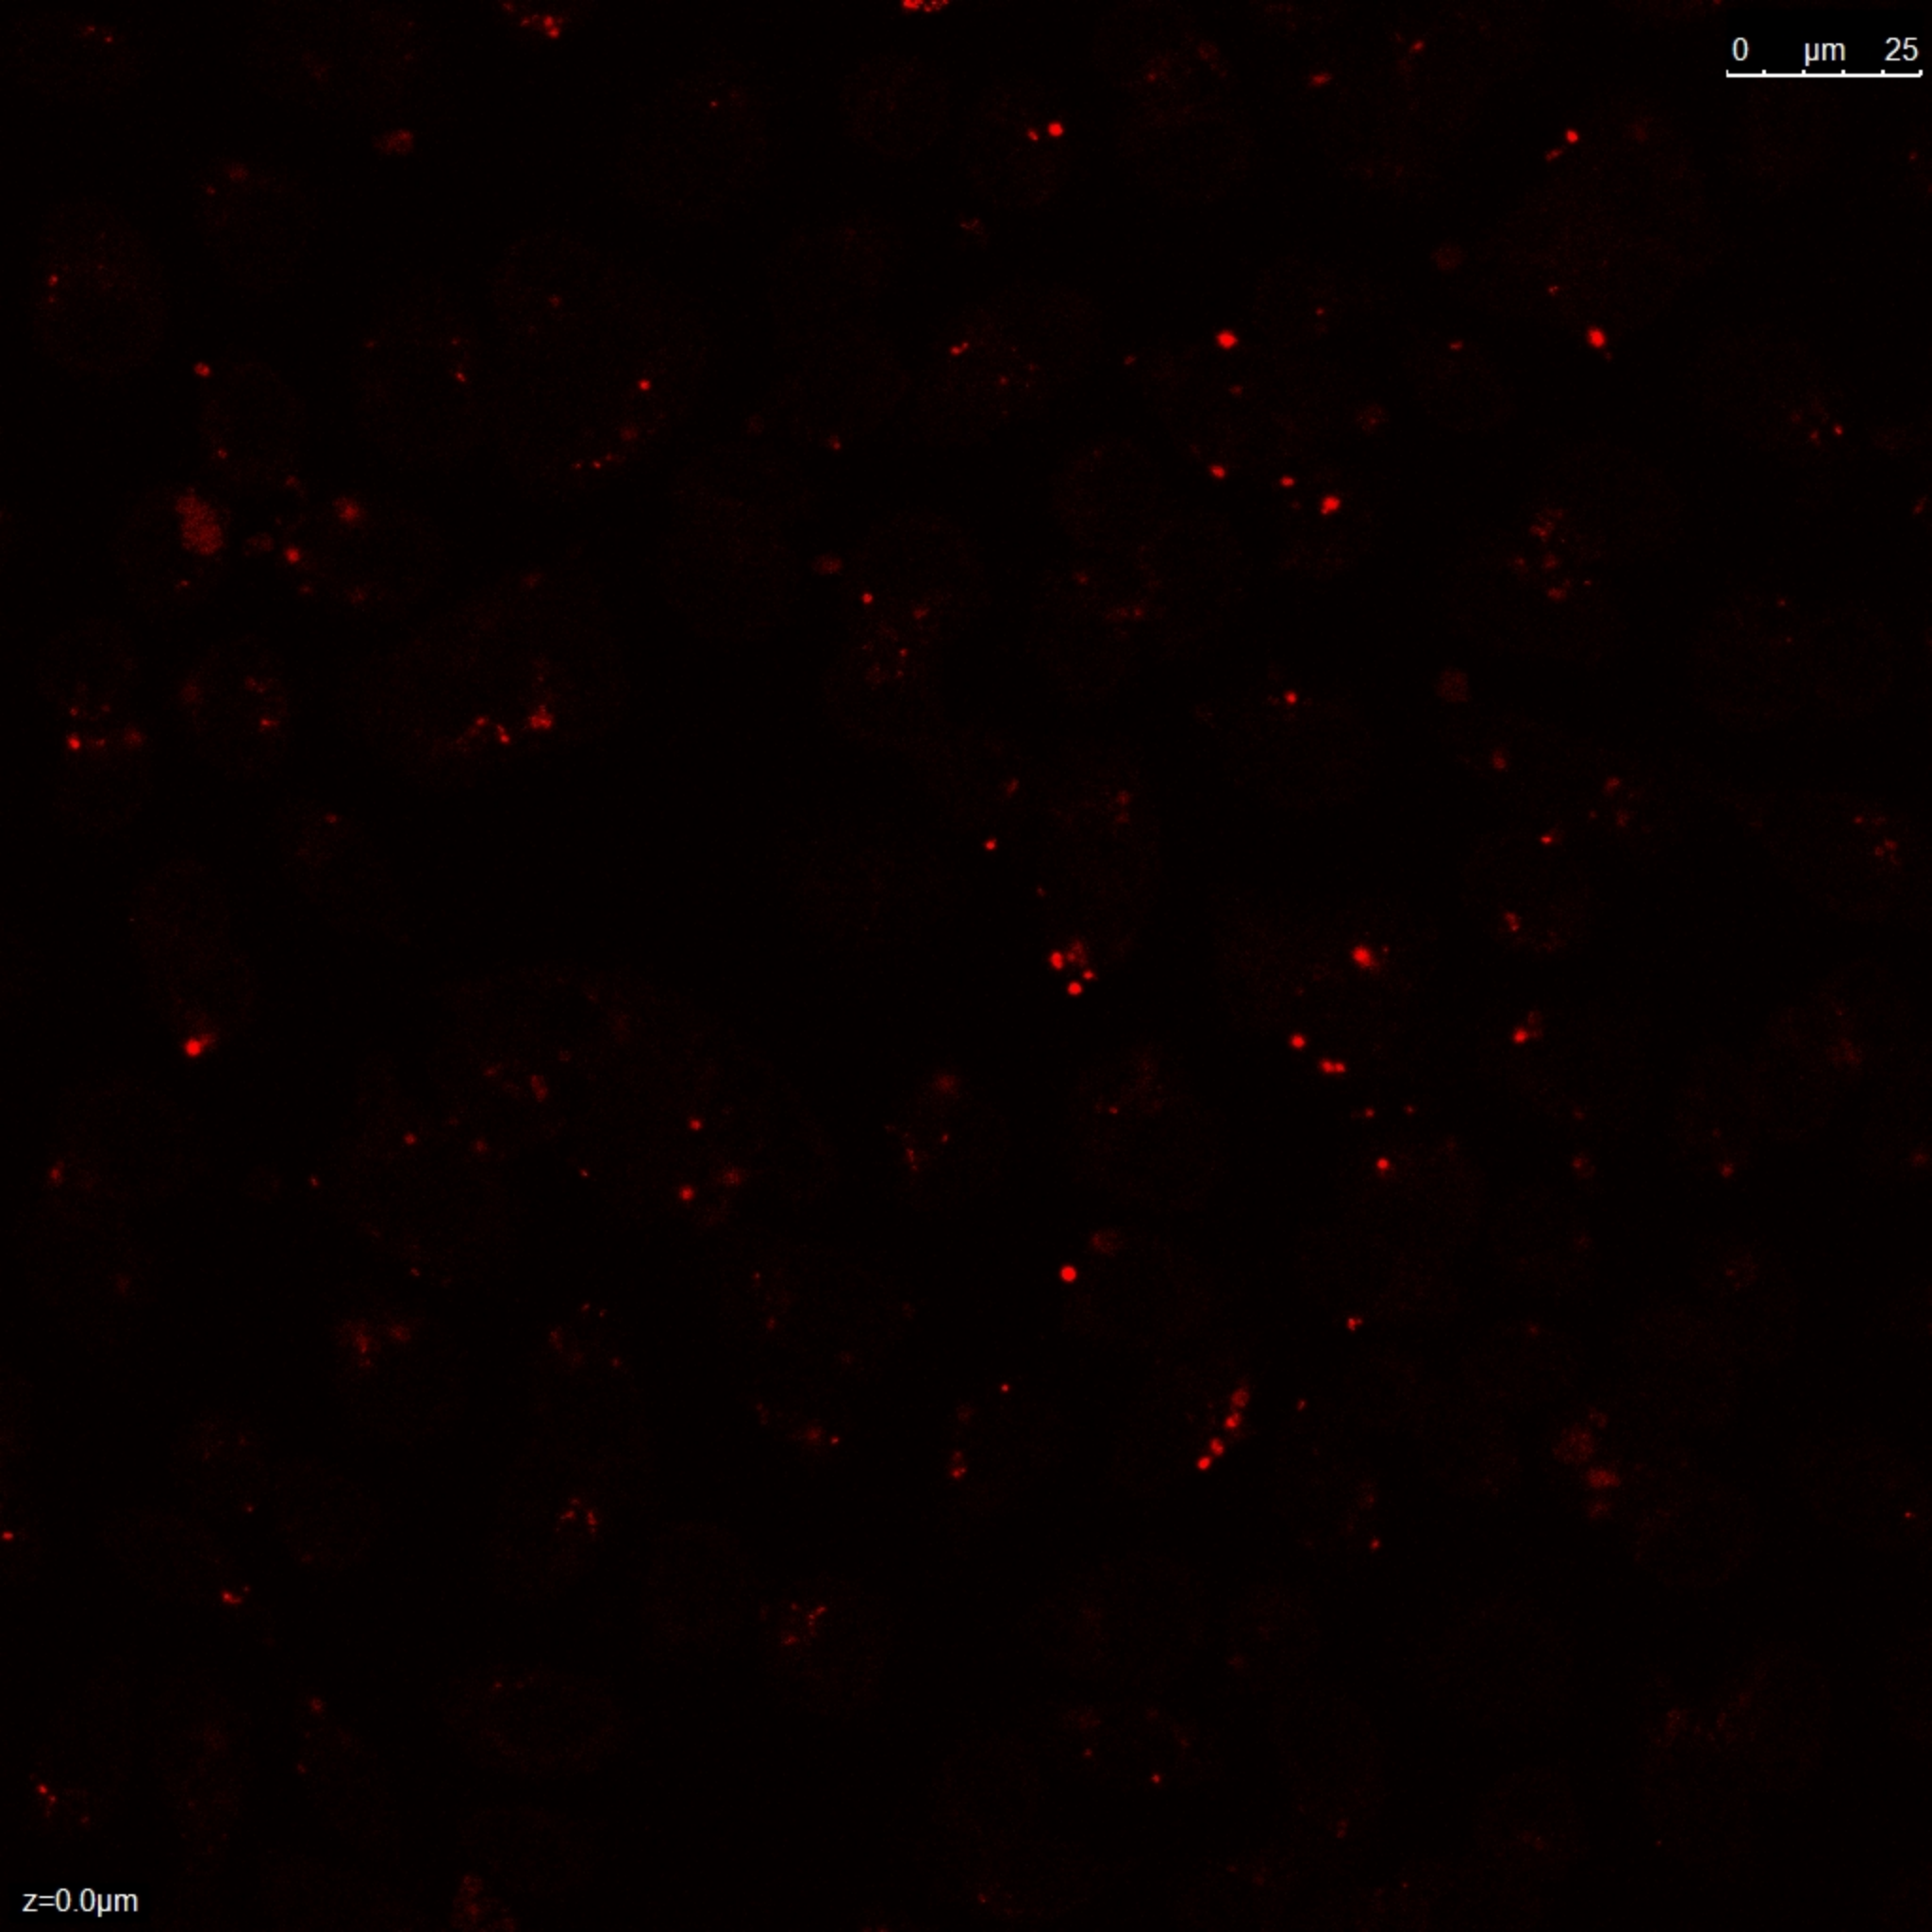

0  $\mu\text{m}$  25

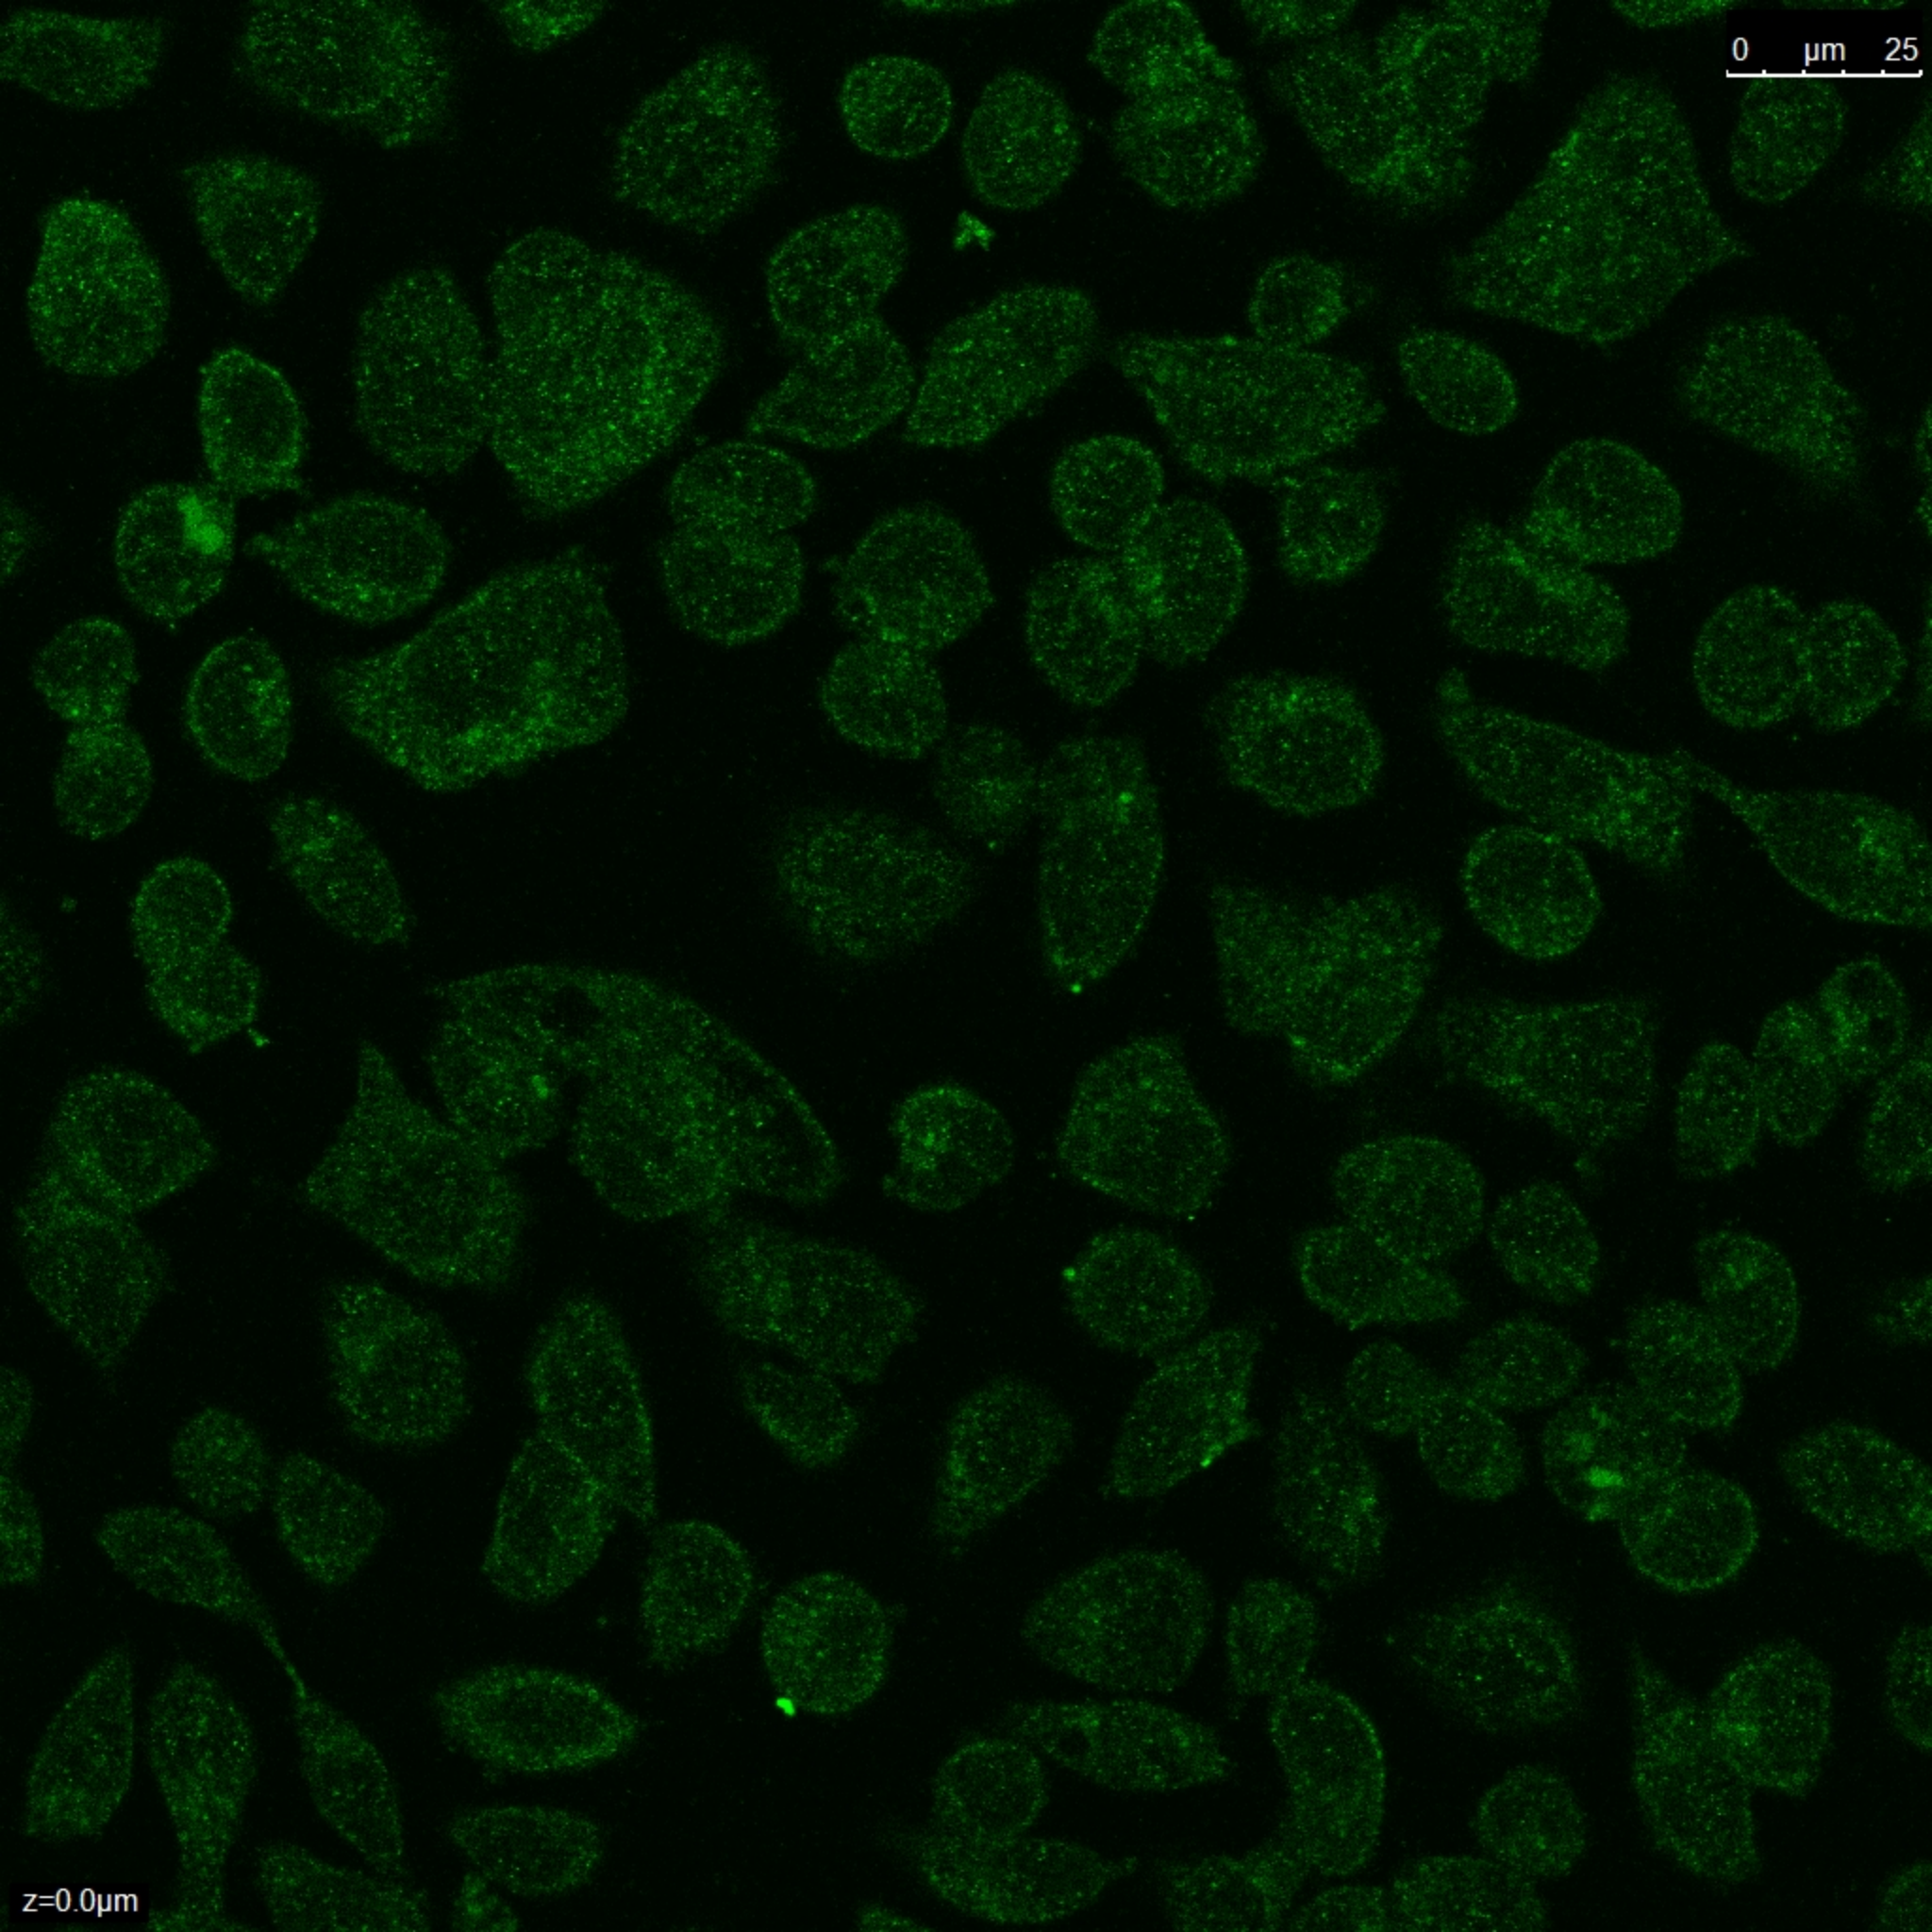

z=0.0 $\mu\text{m}$

0  $\mu\text{m}$  25

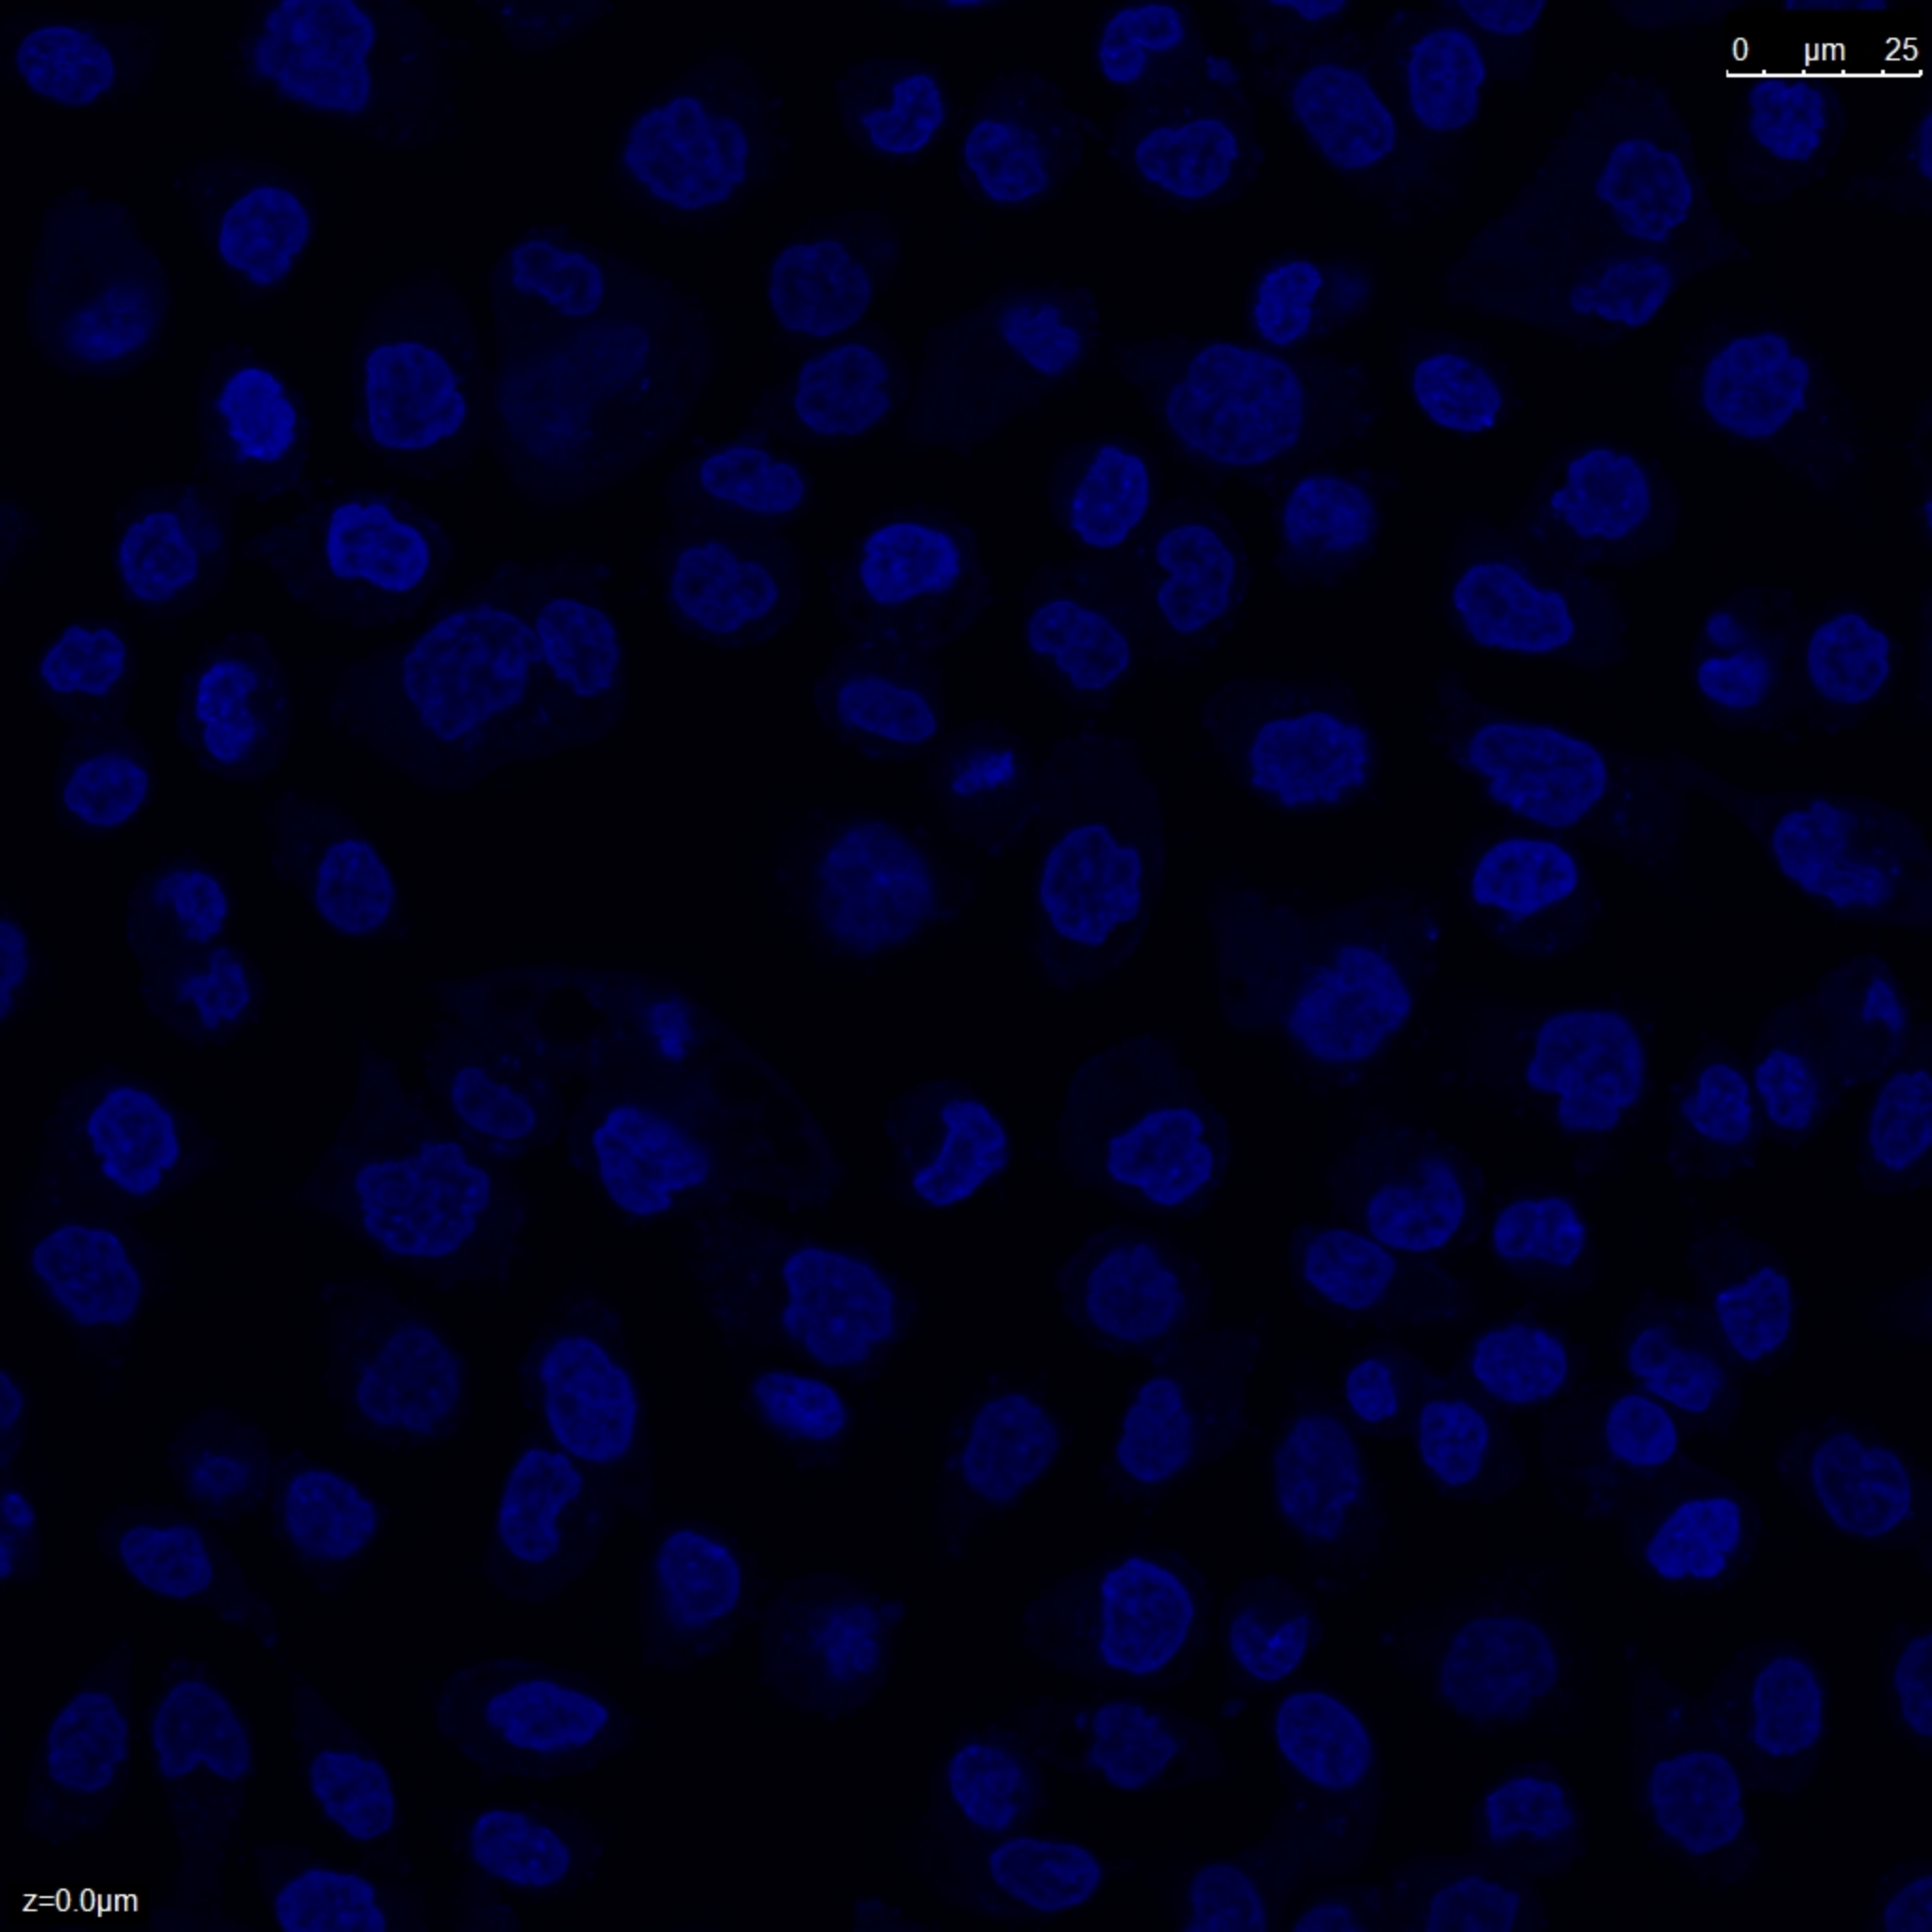

z=0.0  $\mu\text{m}$

0  $\mu\text{m}$  25

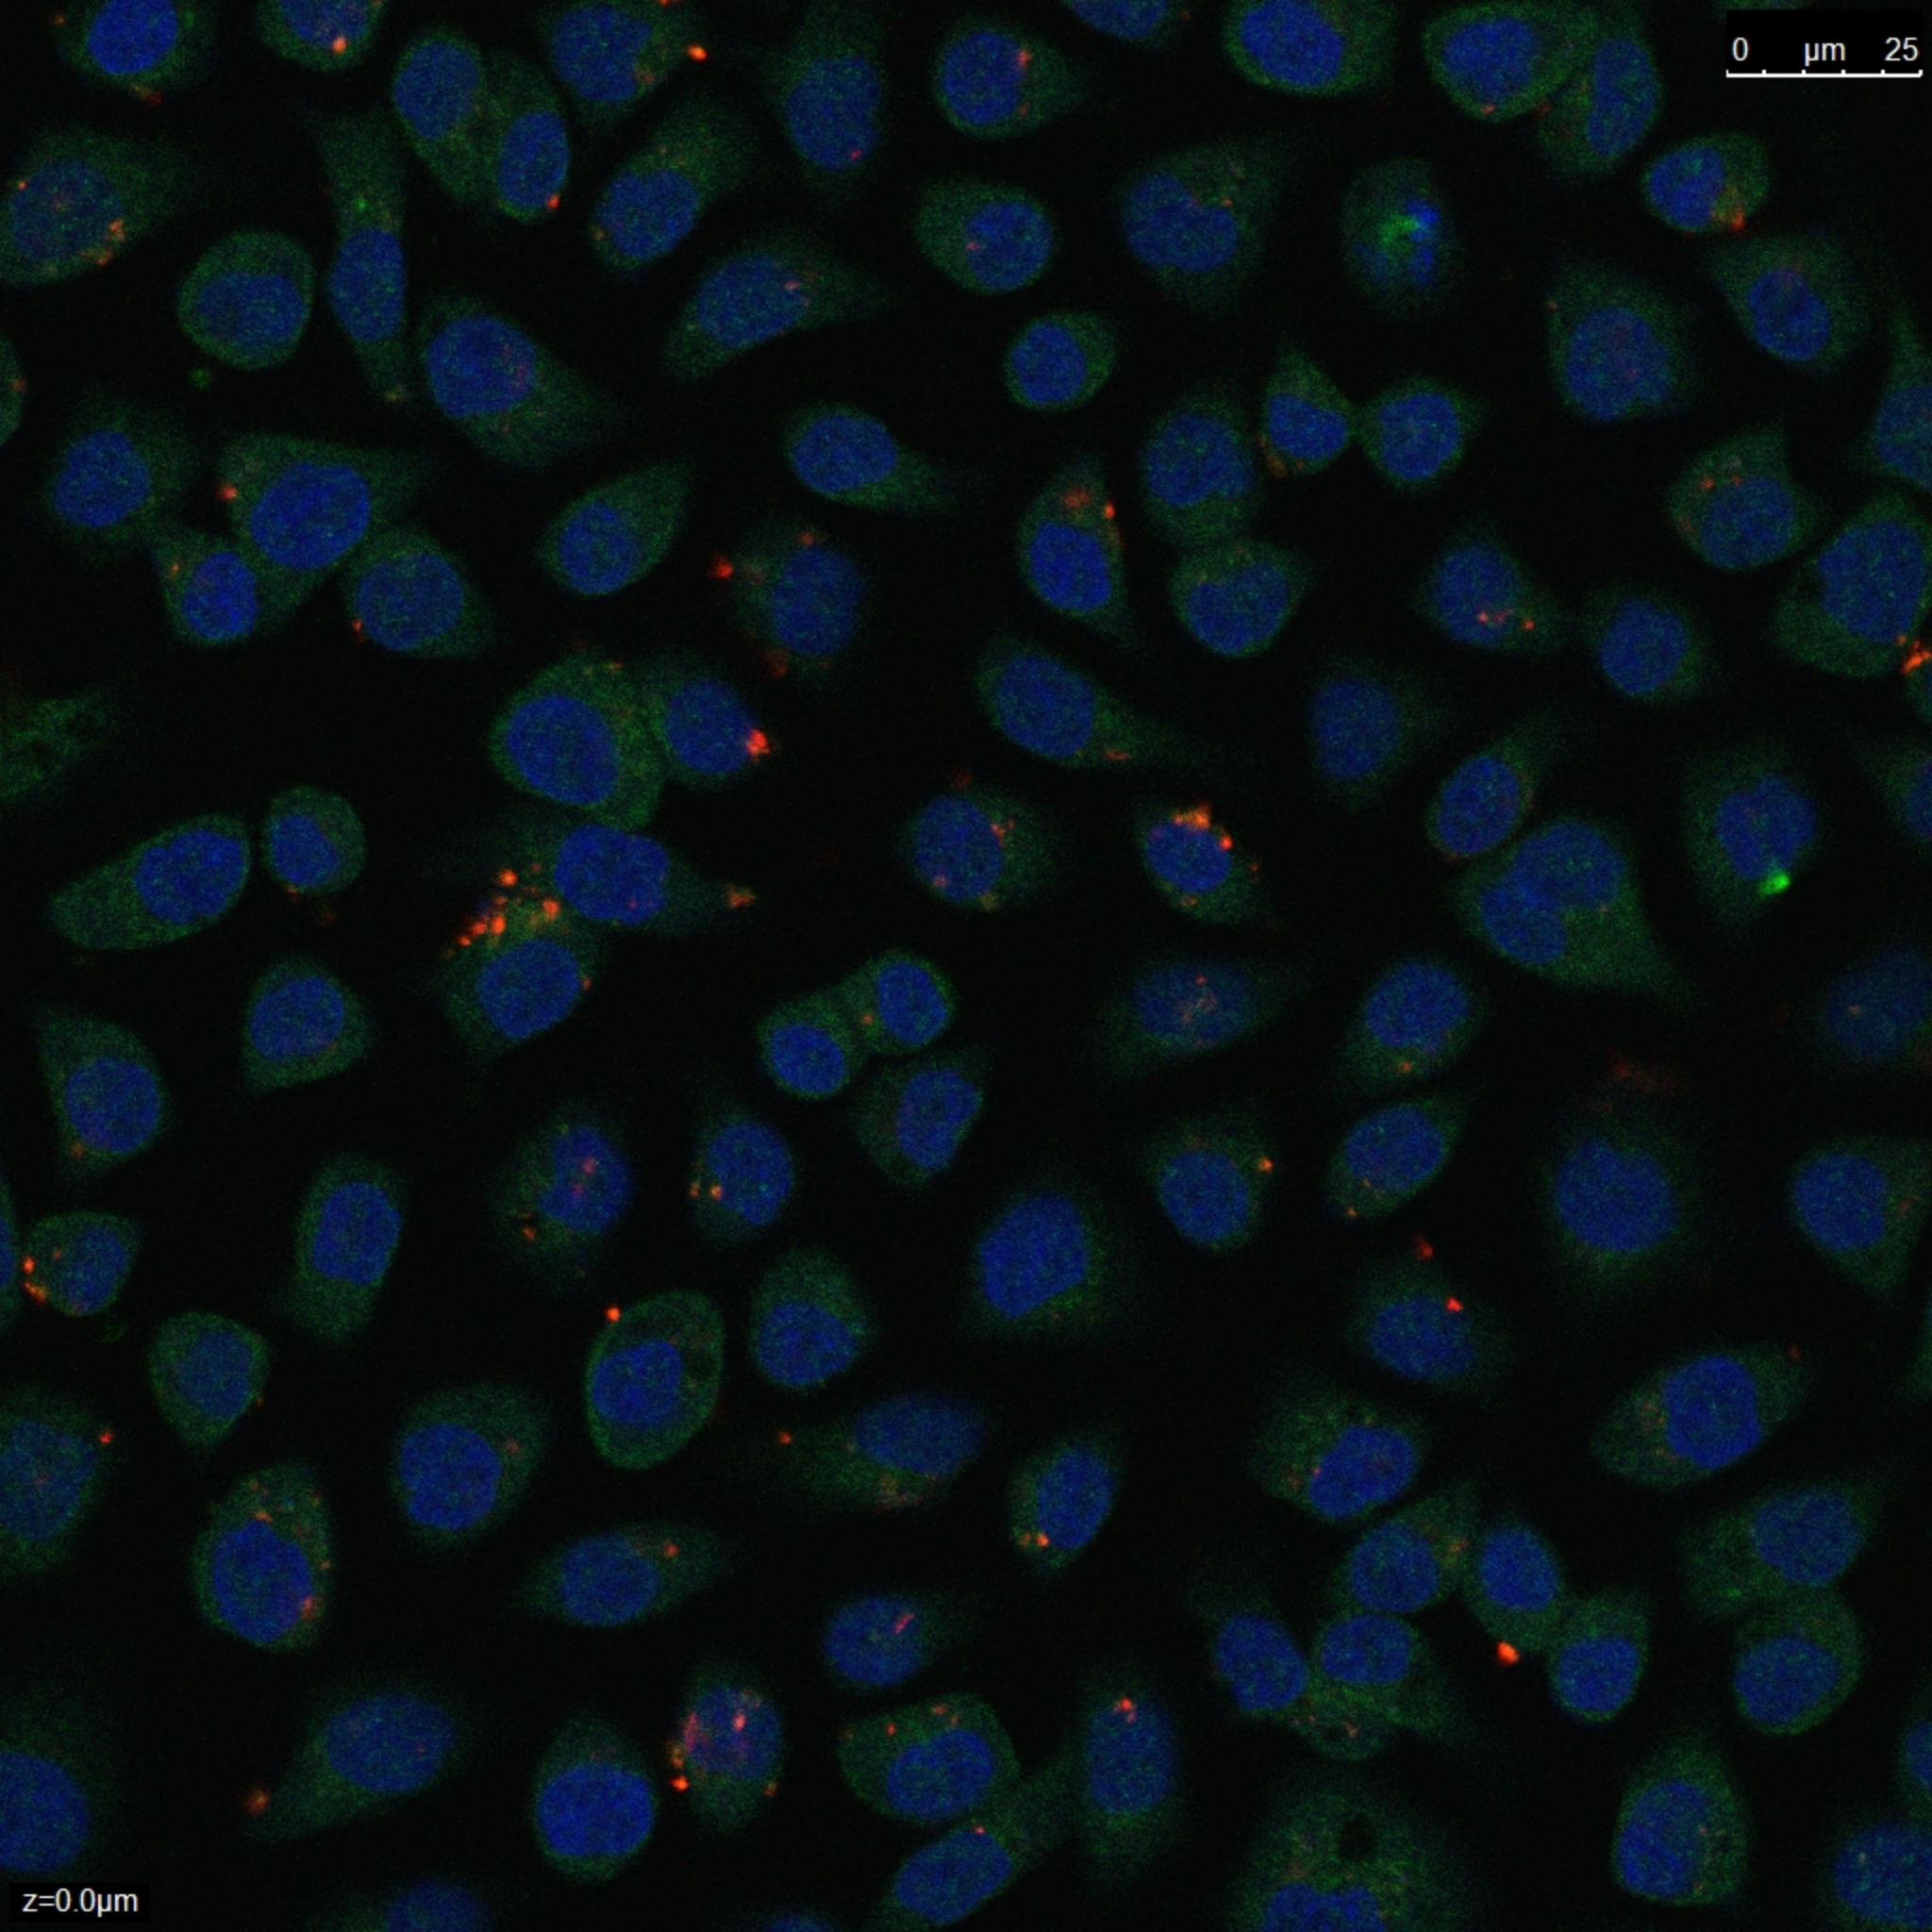

$z=0.0\mu\text{m}$

0  $\mu\text{m}$  25

$z=0.0\mu\text{m}$

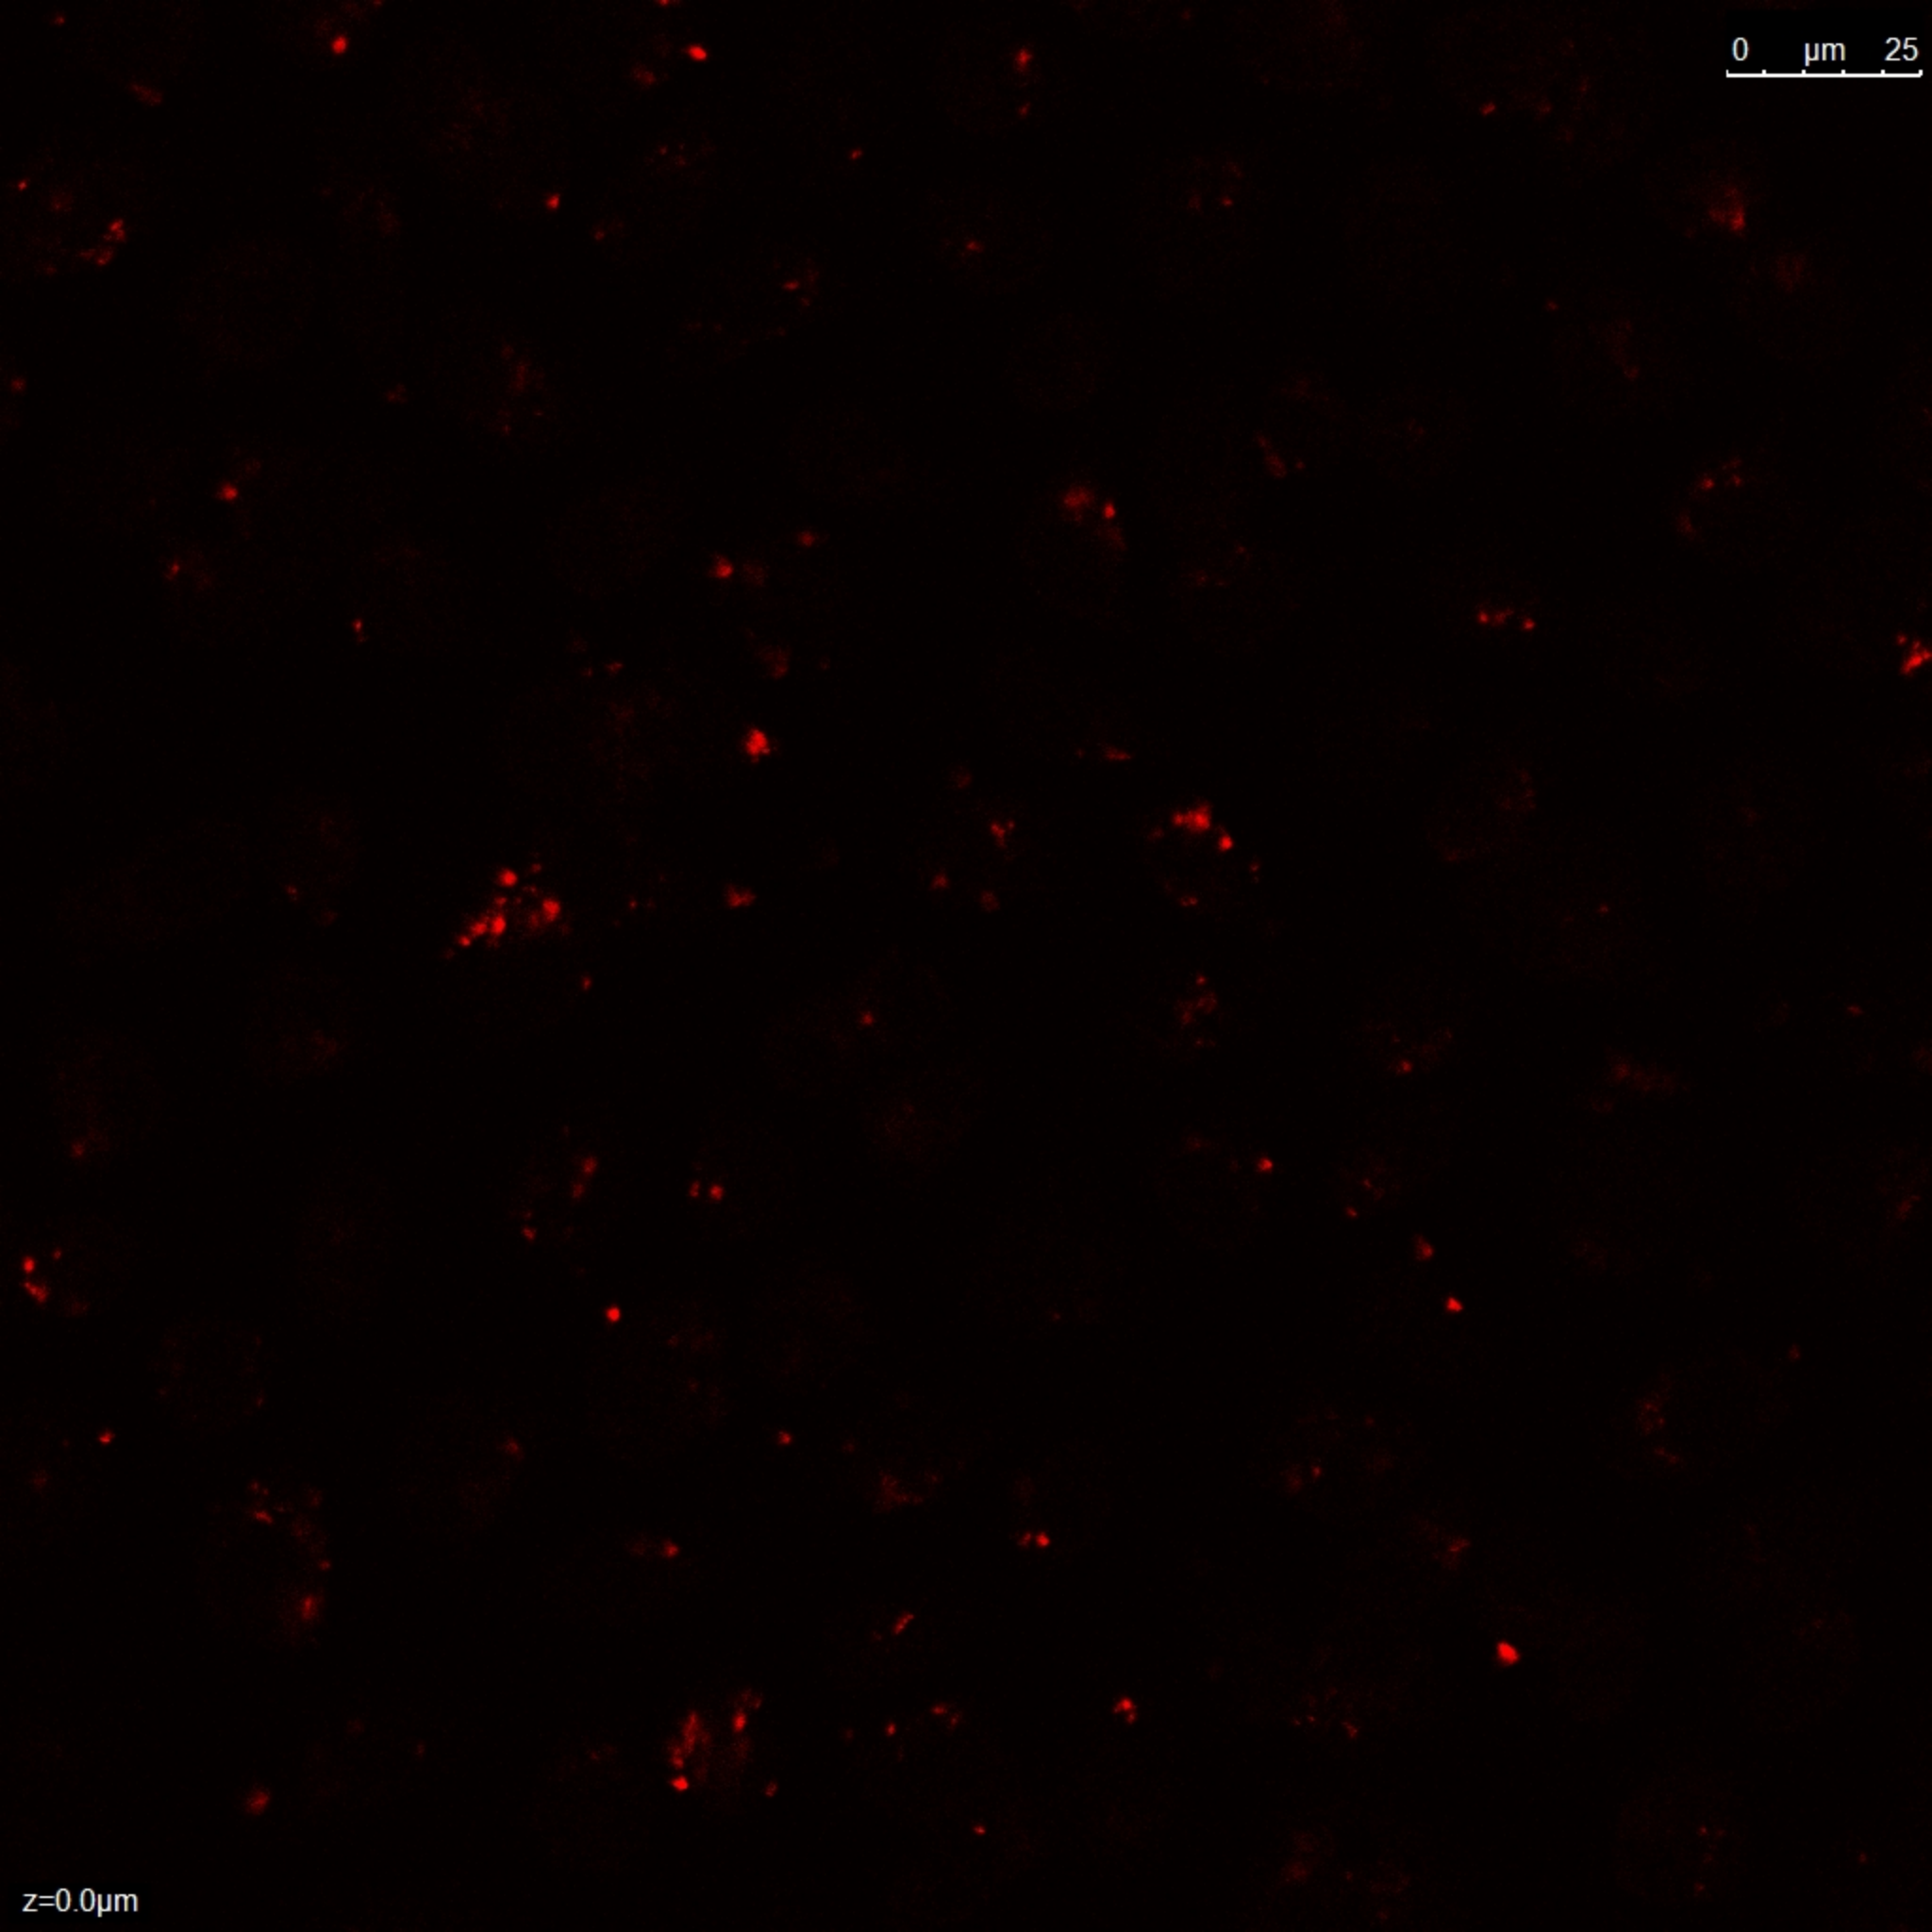

0  $\mu\text{m}$  25

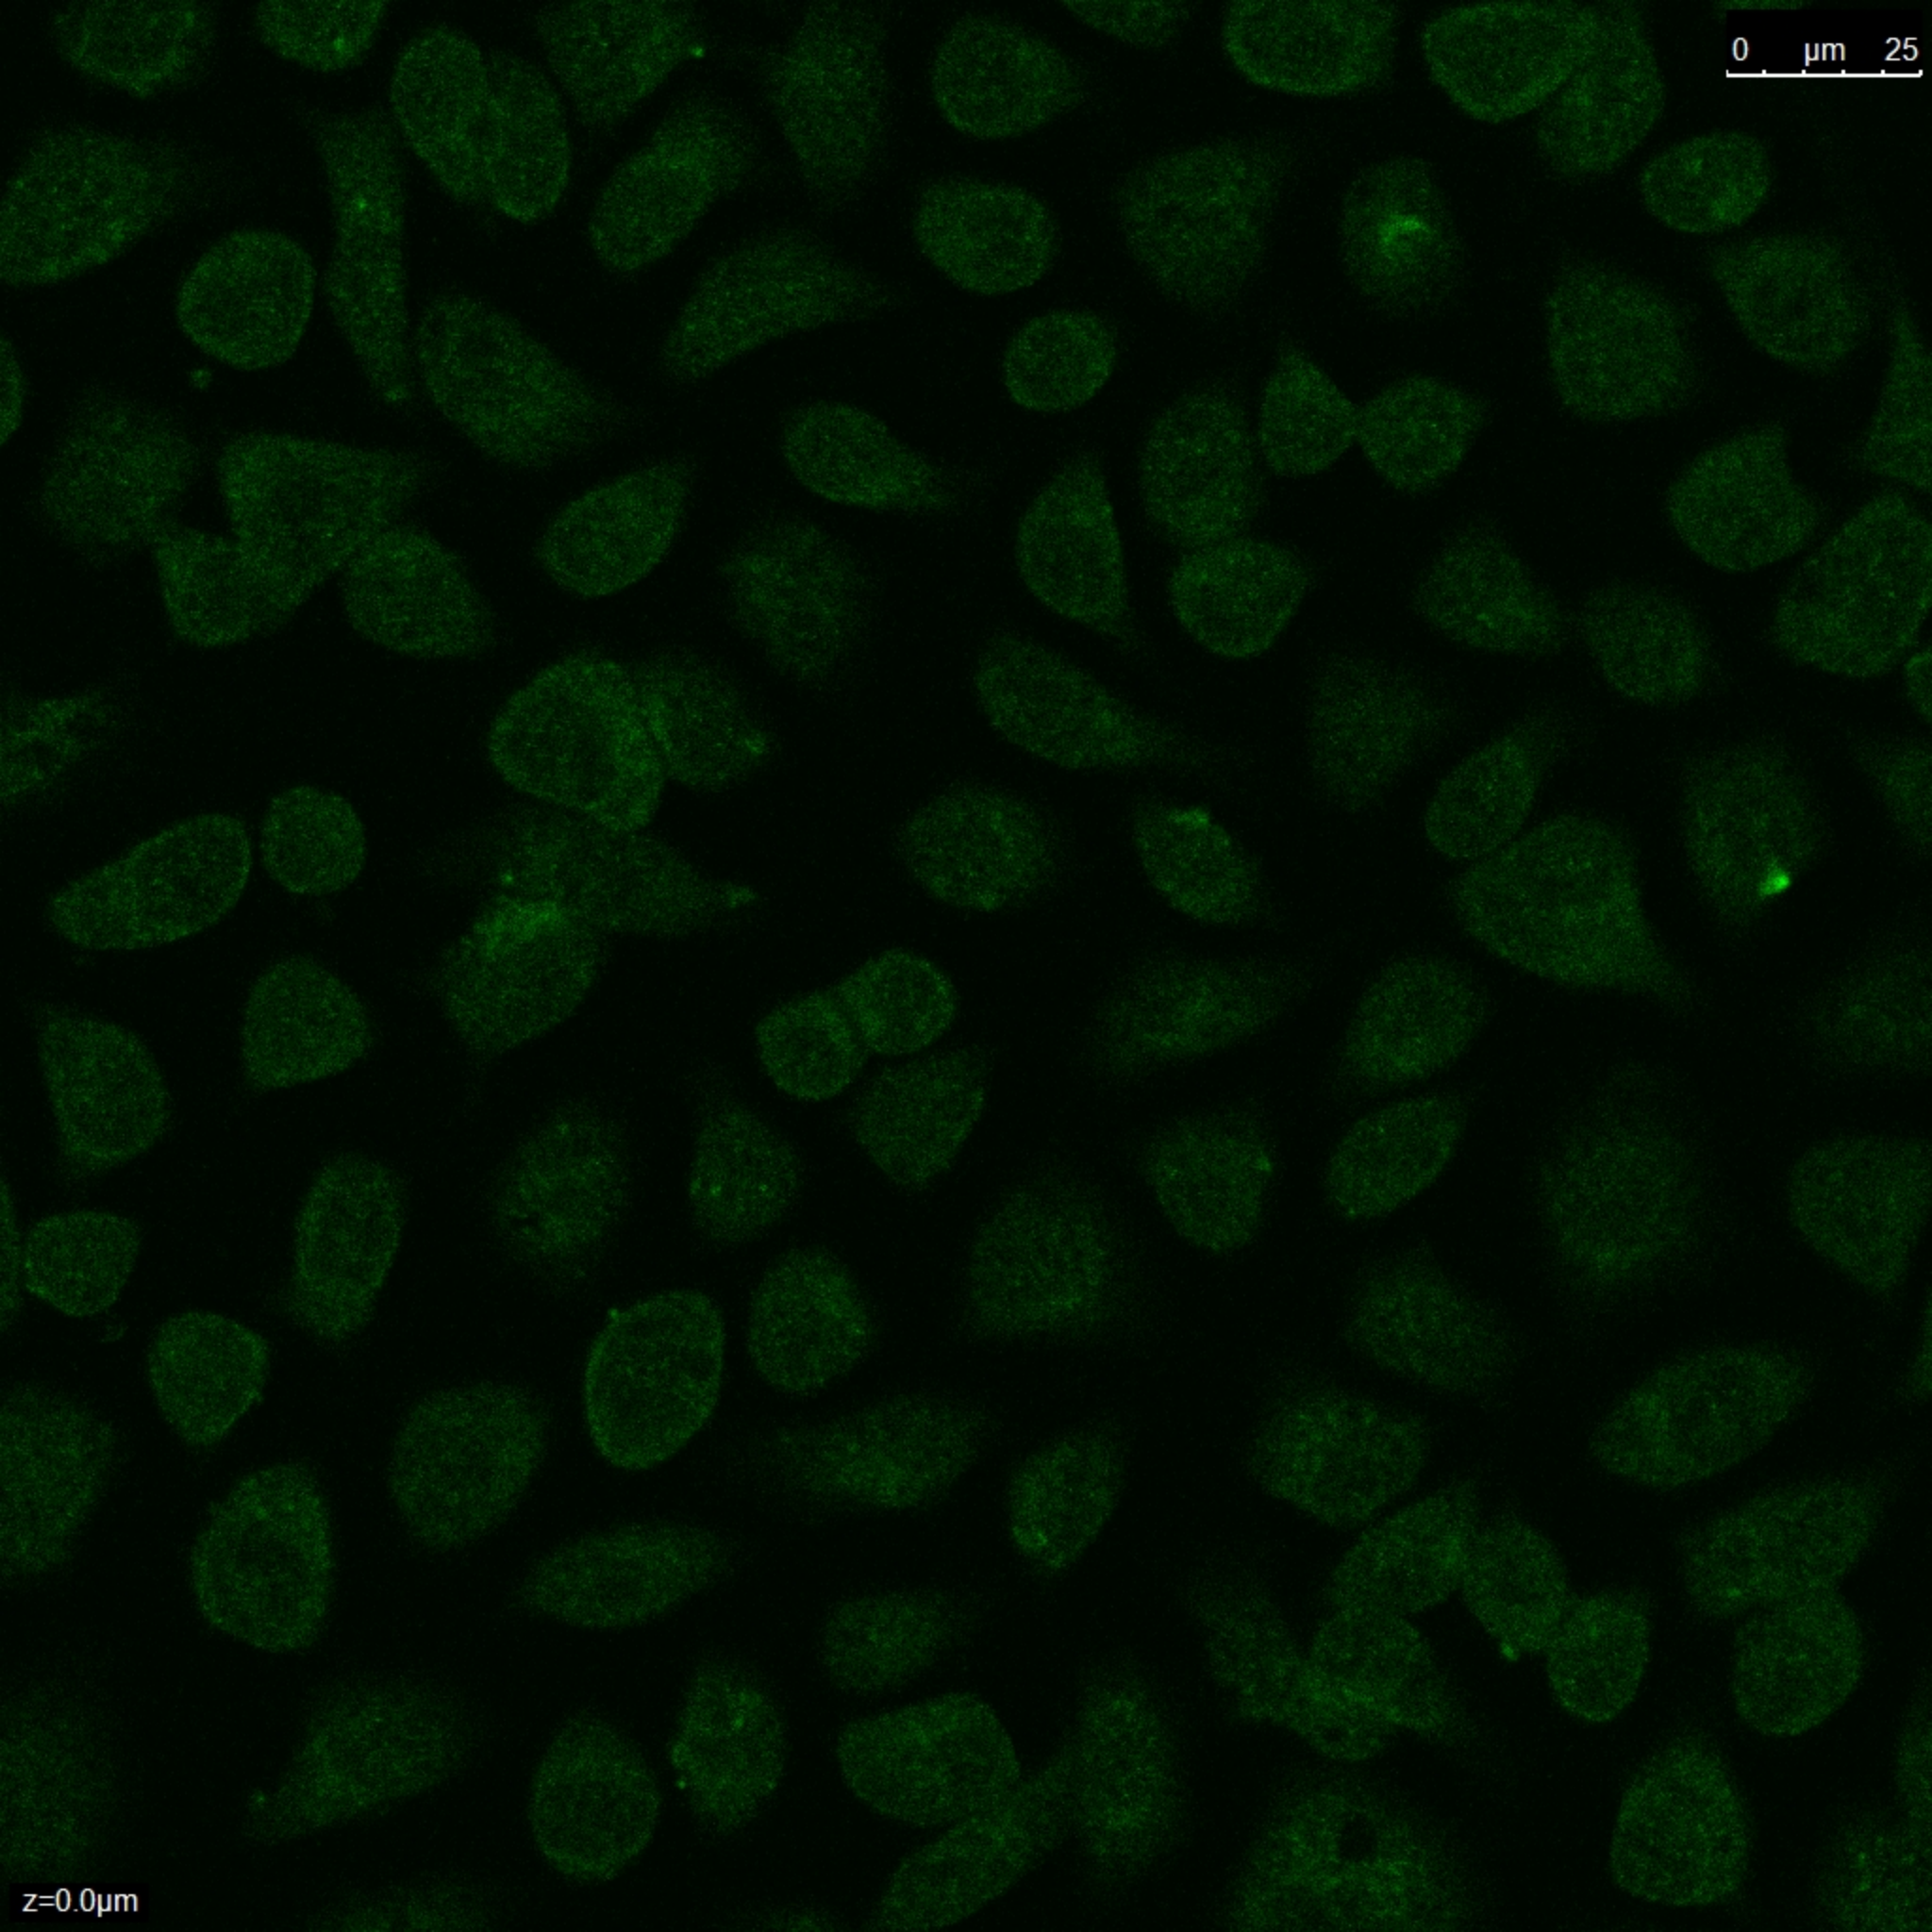

z=0.0 $\mu\text{m}$

0  $\mu\text{m}$  25

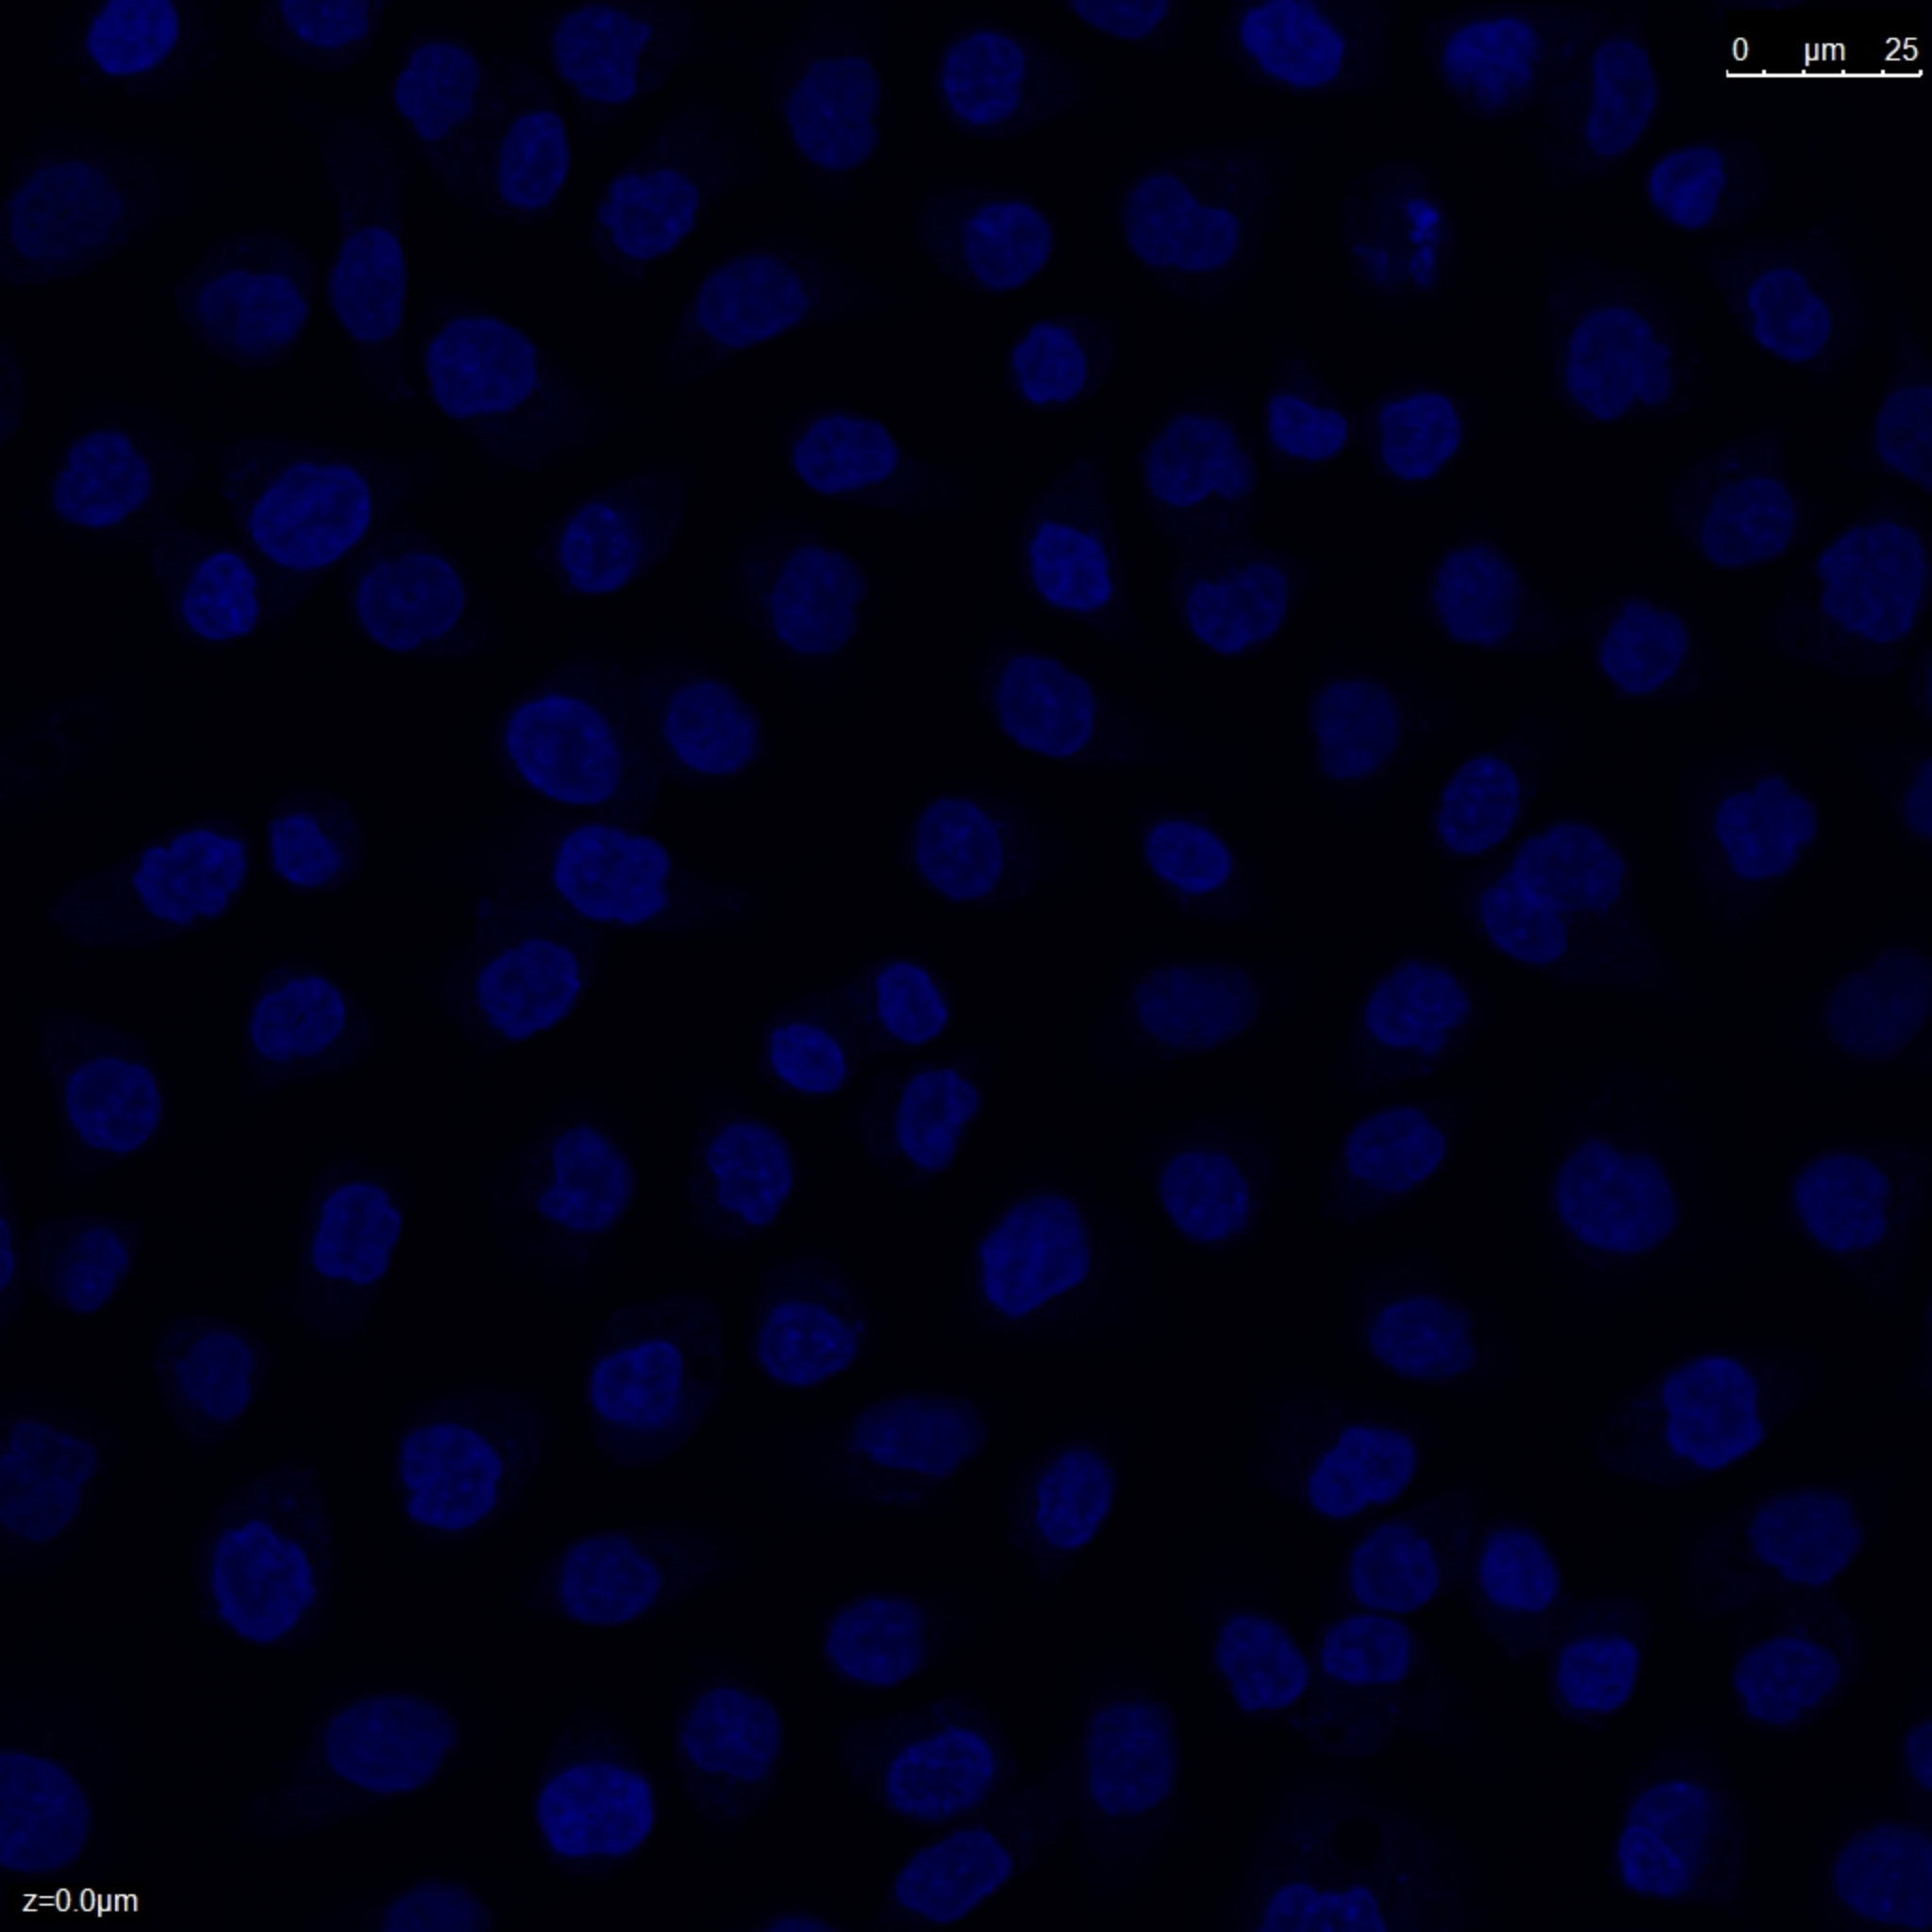

z=0.0 $\mu\text{m}$
