# Supplementary material for: High expression of Helicobacter pylori VapD in both the intracellular environment and biopsies from gastric patients with severity
Source: PubMed Central journal article supplement (PMC7067408; doi:10.1371/journal.pone.0230220), 2020-03-12
Supplement: pone.0230220.s009.pdf [file pone.0230220.s009.pdf]

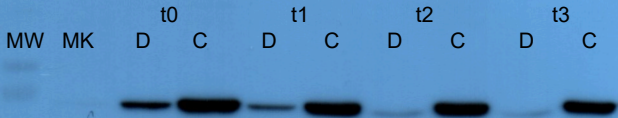

Exp 2

Gel 1

t4                      t5                      t6                      t7                      t8  
D    C            D    C            D    C            D    C            D    C

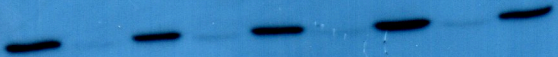

Exp 2 Gel 2

MW MK t0 t1 t2 t3  
D C D C D C D C D C

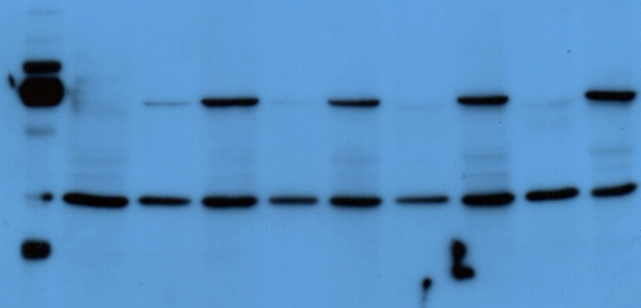

NAPON Gel 1 & Gel 2

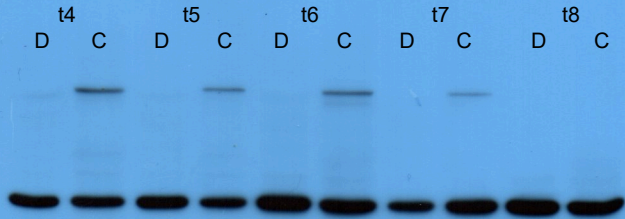

GAPDH Exp1

Gel 2
